# Supplementary material
Source: PubMed Central journal article supplement (PMC2938112)
Supplement: supp_M900566-MCP200_Supplemental_material.pdf [file supp_M900566-MCP200_Supplemental_material.pdf]

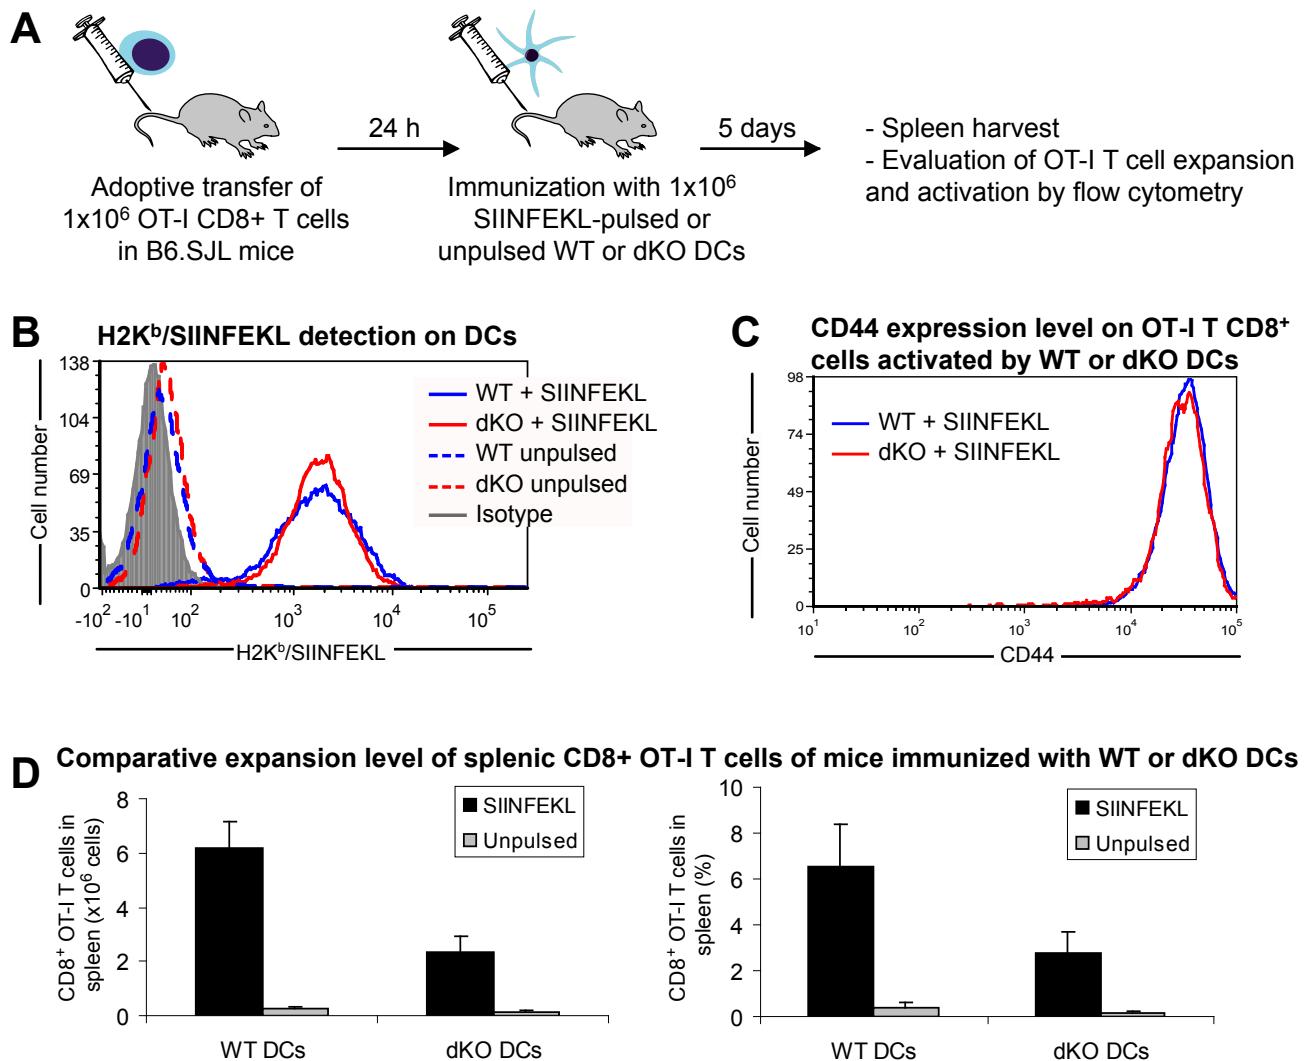

**Figure S1. dKO DCs are able to activate T cells but are less efficient than WT DCs.** (A) Experimental model. (B) WT and dKO DCs pulsed with SIINFEKL express similar levels of H2K<sup>b</sup>/SIINFEKL at cell surface. Mature WT and dKO DCs were either left untouched or stripped with mild acid buffer, pulsed with 2  $\mu$ M of SIINFEKL peptide for 1h at 26°C followed by a 3h incubation at 37°C. SIINFEKL cell-surface level was compared by flow cytometry using the 25-D1.16 antibody (Porgador A et al, Immunity 1997, 6:715-26). Showing one representative experiment. (C) dKO DCs are able to activate CD8<sup>+</sup> OT-I T cells. CD8<sup>+</sup> OT-I T cells from mice primed with SIINFEKL-pulsed WT or dKO DCs express similar levels of CD44. Showing one representative experiment. (D) dKO DCs activate OT-I T cells less efficiently than WT DCs. Mice primed with SIINFEKL-pulsed WT or dKO DCs were evaluated for their abundance of splenic CD8<sup>+</sup> OT-I T cells (mean  $\pm$  SD of triplicate experiments).

**Supplemental Table S1.** Total list of MHC I-peptides detected on DCs

| Peptide number | m/z    | Charge | Mascot score | Average intensity |        | Fold change WT / dKO | P value | MHC I allele | Peptide sequence | IPI accession | Gene ID   | Gene symbol   | Description                                                                              |
|----------------|--------|--------|--------------|-------------------|--------|----------------------|---------|--------------|------------------|---------------|-----------|---------------|------------------------------------------------------------------------------------------|
|                |        |        |              | WT                | dKO    |                      |         |              |                  |               |           |               |                                                                                          |
| 1              | 520,22 | 2      | 66           | 17719197          | 15000  | ≥ 1181,3             | 0,0121  | H2Db         | GGVVNMYHM        | IPI00116712   | 16913     | Psm8          | proteasome (prosome, macropain) subunit, beta type 8 (large multifunctional peptidase 7) |
| 2              | 460,25 | 2      | 40           | 5711531           | 15000  | ≥ 380,8              | 0,0289  | H2Kb         | ATRSFPQL         | IPI00114017   | 11750     | Anxa7         | annexin A7                                                                               |
| 3              | 624,83 | 2      | 44           | 3109929           | 15000  | ≥ 207,3              | 0,0521  | H2Db         | HAIRNSFQYL       | IPI00129408   | 170749    | Mtmr4         | myotubularin related protein 4                                                           |
| 4              | 472,28 | 2      | 55           | 17359812          | 108141 | 160,5                | n/a     | H2Kb         | TIIFHSL          | IPI00409303   | 14049     | Eya2          | eyes absent 2 homolog (Drosophila)                                                       |
| 4              | 472,28 | 2      | 55           | 17359812          | 108141 | 160,5                | n/a     | H2Kb         | TIIFHSL          | IPI00409303   | 14050     | Eya3          | eyes absent 3 homolog (Drosophila)                                                       |
| 5              | 497,27 | 2      | 43           | 2389015           | 15000  | ≥ 159,3              | 0,0166  | H2Kb         | VVYIYHSL         | IPI00131778   | 67014     | Mina          | myc induced nuclear antigen                                                              |
| 6              | 467,28 | 2      | 47           | 6002847           | 49705  | 120,8                | 0,0416  | H2Kb         | SALRFLNL         | IPI00467059   | 71728     | Stk11ip       | serine/threonine kinase 11 interacting protein                                           |
| 7              | 479,28 | 2      | 39           | 1646903           | 15000  | ≥ 109,8              | 0,0062  | H2Kb         | KNVLFSHL         | IPI00119575   | 19085     | Prkar1b       | protein kinase, cAMP dependent regulatory, type I beta                                   |
| 7              | 479,28 | 2      | 39           | 1646903           | 15000  | ≥ 109,8              | 0,0062  | H2Kb         | KNVLFSHL         | IPI00119575   | 19084     | Prkar1a       | protein kinase, cAMP dependent regulatory, type I, alpha                                 |
| 8              | 524,27 | 2      | 65           | 1452443           | 15000  | ≥ 96,8               | 0,0113  | H2Db         | RQILNADAM        | IPI00348445   | 66185     | 1110037F02Rik | RIKEN cDNA 1110037F02 gene                                                               |
| 9              | 496,78 | 2      | 42           | 1408070           | 15000  | ≥ 93,9               | 0,0069  | H2Db         | SGLLNMTKI        | IPI00336411   | 216445    | Arhgap9       | Rho GTPase activating protein 9                                                          |
| 10             | 525,26 | 2      | 29           | 1400447           | 15000  | ≥ 93,4               | 0,0036  | H2Kb         | HVYYFAHL         | IPI00458896   | 74558     | Gvin1         | GTPase, very large interferon inducible 1                                                |
| 11             | 510,80 | 2      | 56           | 1249205           | 15000  | ≥ 83,3               | 0,0097  | H2Kb         | VITNFSARI        | IPI00652882   | 68505     | 1110014N23Rik | RIKEN cDNA 1110014N23 gene                                                               |
| 12             | 507,26 | 2      | 49           | 1232097           | 15000  | ≥ 82,1               | 0,0232  | H2Kb         | STLIYRNM         | IPI00111739   | 75660     | Lin37         | lin-37 homolog (C. elegans)                                                              |
| 13             | 597,28 | 2      | 27           | 1207015           | 15000  | ≥ 80,5               | 0,0030  | H2Db         | SAIHNFYDNI       | IPI00115639   | 68652     | Map3k7ip2     | mitogen-activated protein kinase kinase kinase 7 interacting protein 2                   |
| 14             | 523,75 | 2      | 34           | 1154077           | 15000  | ≥ 76,9               | 0,0141  | H2Db         | SQVYNDAHI        | IPI00669369   | 66923     | Pbrm1         | polybromo 1                                                                              |
| 15             | 537,27 | 2      | 40           | 1142903           | 15000  | ≥ 76,2               | 0,0366  | H2Kb         | LVYQFKEM         | IPI00120304   | 13709     | Elf1          | E74-like factor 1                                                                        |
| 15             | 537,27 | 2      | 40           | 1142903           | 15000  | ≥ 76,2               | 0,0366  | H2Kb         | LVYQFKEM         | IPI00120304   | 56501     | Elf4          | E74-like factor 4 (ets domain transcription factor)                                      |
| 16             | 461,76 | 2      | 62           | 12933107          | 188768 | 68,5                 | n/a     | H2Db         | GAVQNI AHL       | IPI00187396   | 74125     | Armc8         | armadillo repeat containing 8                                                            |
| 17             | 496,28 | 2      | 32           | 4515404           | 66333  | 68,1                 | 0,0047  | H2Kb         | ISLEFRNL         | IPI00134836   | 14137     | Fdf1          | farnesyl diphosphate farnesyl transferase 1                                              |
| 18             | 506,30 | 2      | 43           | 996092            | 15000  | ≥ 66,4               | 0,0619  | H2Kb         | KSYLFQLL         | IPI00124240   | 12566     | Cdk2          | cyclin-dependent kinase 2                                                                |
| 19             | 447,74 | 2      | 53           | 35875678          | 654361 | 54,8                 | 0,0034  | H2Db         | GGIQNVGHI        | IPI00624746   | 23918     | Impdh2        | inosine 5'-phosphate dehydrogenase 2                                                     |
| 20             | 493,24 | 2      | 41           | 695711            | 15000  | ≥ 46,4               | 0,0534  | H2Kb         | SNYRFEGL         | IPI00606873   | 319955    | Ercc6         | excision repair cross-complementing rodent repair deficiency, complementation group 6    |
| 21             | 479,75 | 2      | 37           | 628058            | 15000  | ≥ 42,0               | 0,0783  | Qa2          | GLMTTVHAI        | IPI00271869   | 100039840 | LOC100039840  | glyceraldehyde-3-phosphate dehydrogenase pseudogene                                      |
| 21             | 479,75 | 2      | 37           | 628058            | 15000  | ≥ 42,0               | 0,0783  | Qa2          | GLMTTVHAI        | IPI00271869   | 100041342 | LOC100041342  | glyceraldehyde-3-phosphate dehydrogenase pseudogene                                      |
| 21             | 479,75 | 2      | 37           | 628058            | 15000  | ≥ 42,0               | 0,0783  | Qa2          | GLMTTVHAI        | IPI00271869   | 215974    | EG215974      | predicted gene, EG215974                                                                 |
| 21             | 479,75 | 2      | 37           | 628058            | 15000  | ≥ 42,0               | 0,0783  | Qa2          | GLMTTVHAI        | IPI00271869   | 638833    | EG638833      | predicted gene, EG638833                                                                 |
| 21             | 479,75 | 2      | 37           | 628058            | 15000  | ≥ 42,0               | 0,0783  | Qa2          | GLMTTVHAI        | IPI00271869   | 100040109 | LOC100040109  | similar to Glyceraldehyde-3-phosphate dehydrogenase                                      |
| 21             | 479,75 | 2      | 37           | 628058            | 15000  | ≥ 42,0               | 0,0783  | Qa2          | GLMTTVHAI        | IPI00271869   | 100041831 | LOC100041831  | similar to Glyceraldehyde-3-phosphate dehydrogenase (GAPDH)                              |

|    |        |   |    |         |        |        |        |      |               |             |           |               |                                                                   |
|----|--------|---|----|---------|--------|--------|--------|------|---------------|-------------|-----------|---------------|-------------------------------------------------------------------|
| 21 | 479,75 | 2 | 37 | 628058  | 15000  | ≥ 42,0 | 0,0783 | Qa2  | GLMTTVHAI     | IPI00271869 | 676923    | LOC676923     | similar to Glyceraldehyde-3-phosphate dehydrogenase (GAPDH)       |
| 21 | 479,75 | 2 | 37 | 628058  | 15000  | ≥ 42,0 | 0,0783 | Qa2  | GLMTTVHAI     | IPI00271869 | 100040634 | LOC100040634  | similar to Glyceraldehyde-3-phosphate dehydrogenase (GAPDH)       |
| 21 | 479,75 | 2 | 37 | 628058  | 15000  | ≥ 42,0 | 0,0783 | Qa2  | GLMTTVHAI     | IPI00271869 | 100048117 | LOC100048117  | similar to Glyceraldehyde-3-phosphate dehydrogenase (GAPDH)       |
| 21 | 479,75 | 2 | 37 | 628058  | 15000  | ≥ 42,0 | 0,0783 | Qa2  | GLMTTVHAI     | IPI00271869 | 100047352 | LOC100047352  | similar to Glyceraldehyde-3-phosphate dehydrogenase (GAPDH)       |
| 21 | 479,75 | 2 | 37 | 628058  | 15000  | ≥ 42,0 | 0,0783 | Qa2  | GLMTTVHAI     | IPI00271869 | 100044981 | LOC100044981  | similar to Glyceraldehyde-3-phosphate dehydrogenase (GAPDH)       |
| 21 | 479,75 | 2 | 37 | 628058  | 15000  | ≥ 42,0 | 0,0783 | Qa2  | GLMTTVHAI     | IPI00271869 | 100039258 | LOC100039258  | similar to Glyceraldehyde-3-phosphate dehydrogenase (GAPDH)       |
| 21 | 479,75 | 2 | 37 | 628058  | 15000  | ≥ 42,0 | 0,0783 | Qa2  | GLMTTVHAI     | IPI00271869 | 640374    | LOC640374     | similar to Glyceraldehyde-3-phosphate dehydrogenase (GAPDH)       |
| 21 | 479,75 | 2 | 37 | 628058  | 15000  | ≥ 42,0 | 0,0783 | Qa2  | GLMTTVHAI     | IPI00271869 | 100041236 | LOC100041236  | similar to Glyceraldehyde-3-phosphate dehydrogenase (GAPDH)       |
| 21 | 479,75 | 2 | 37 | 628058  | 15000  | ≥ 42,0 | 0,0783 | Qa2  | GLMTTVHAI     | IPI00271869 | 100039875 | LOC100039875  | similar to LOC654472 protein                                      |
| 22 | 645,34 | 2 | 33 | 604411  | 15000  | ≥ 40,3 | 0,0041 | H2Db | AQYGNILKHVM   | IPI00469331 | 69482     | Nup35         | nucleoporin 35                                                    |
| 23 | 486,78 | 2 | 48 | 3552727 | 89347  | 39,8   | 0,0043 | H2Db | KAPLNIAVM     | IPI00515476 | 432555    | EG432555      | predicted gene, EG432555                                          |
| 23 | 486,78 | 2 | 48 | 3552727 | 89347  | 39,8   | 0,0043 | H2Db | KAPLNIAVM     | IPI00515476 | 245240    | 9930111J21Rik | RIKEN cDNA 9930111J21 gene                                        |
| 23 | 486,78 | 2 | 48 | 3552727 | 89347  | 39,8   | 0,0043 | H2Db | KAPLNIAVM     | IPI00515476 | 667214    | RP23-269N23.3 | interferon-inducible GTPase family member                         |
| 24 | 510,81 | 2 | 54 | 563705  | 15000  | ≥ 37,6 | 0,0368 | H2Db | YGLLNVTKI     | IPI00223751 | 75415     | Arhgap12      | Rho GTPase activating protein 12                                  |
| 25 | 501,27 | 2 | 42 | 561646  | 15000  | ≥ 37,4 | 0,0298 | H2Db | SALANYIHL     | IPI00331026 | 58245     | Gpr180        | G protein-coupled receptor 180                                    |
| 26 | 488,76 | 2 | 41 | 491858  | 15000  | 32,8   | 0,0201 | H2Kb | VNQKFNNL      | IPI00310862 | 218977    | Dlg7          | discs, large homolog 7 (Drosophila)                               |
| 27 | 524,81 | 2 | 41 | 5781657 | 178129 | 32,5   | 0,0022 | H2Db | YGIRNSLLI     | IPI00331302 | 20133     | Rrm1          | ribonucleotide reductase M1                                       |
| 28 | 470,24 | 2 | 44 | 443727  | 15000  | ≥ 29,6 | 0,0531 | H2Kb | SALRFQAM      | IPI00462761 | 74015     | Fcho1         | FCH domain only 1                                                 |
| 29 | 472,25 | 2 | 48 | 3934188 | 140122 | 28,1   | 0,0228 | H2Kb | VNFVHTNL      | IPI00111412 | 67891     | Rpl4          | ribosomal protein L4                                              |
| 30 | 529,79 | 2 | 50 | 410092  | 15000  | ≥ 27,3 | 0,0934 | H2Db | SLLNIQHF      | IPI00762371 | 75089     | Uhrf1bp1      | UHRF1 (ICBP90) binding protein 1-like                             |
| 31 | 456,22 | 2 | 53 | 402561  | 15000  | ≥ 26,8 | 0,0126 | H2Kb | SGYSFTHI      | IPI00110922 | 67019     | Actr6         | ARP6 actin-related protein 6 homolog (yeast)                      |
| 32 | 515,78 | 2 | 48 | 401402  | 15000  | ≥ 26,8 | 0,0955 | H2Kb | SALEFLTHL     | IPI00225210 | 231841    | AA881470      | EST AA881470                                                      |
| 33 | 459,79 | 2 | 29 | 1152330 | 45333  | 25,4   | 0,0030 | H2Kb | IALRYVAL      | IPI00120503 | 70349     | Copb1         | coatamer protein complex, subunit beta 1                          |
| 34 | 543,29 | 2 | 44 | 1760804 | 69450  | 25,4   | 0,0257 | H2Db | FAVVNHQGTG    | IPI00228479 | 216825    | Usp22         | ubiquitin specific peptidase 22                                   |
| 35 | 496,28 | 2 | 49 | 380271  | 15000  | ≥ 25,4 | 0,0014 | H2Db | VAVKNSGGFL    | IPI00266942 | 52635     | D12Ert551e    | DNA segment, Chr 12, ERATO Doi 551, expressed                     |
| 36 | 561,27 | 2 | 31 | 377387  | 15000  | ≥ 25,2 | 0,0832 | H2Db | WAVSNREML     | IPI00330873 | 68477     | Rmnd5a        | required for meiotic nuclear division 5 homolog A (S. cerevisiae) |
| 37 | 552,30 | 2 | 49 | 337581  | 15000  | ≥ 22,5 | n/a    | H2Db | SSLVNKEDVL    | IPI00222429 | 211548    | Nomo1         | nodal modulator 1                                                 |
| 38 | 591,32 | 2 | 38 | 337381  | 15000  | ≥ 22,5 | 0,0023 | H2Db | NAPVNPTRAE    | IPI00124757 | 58801     | Pmaip1        | phorbol-12-myristate-13-acetate-induced protein 1                 |
| 39 | 525,78 | 2 | 55 | 5520689 | 247575 | 22,3   | 0,1098 | H2Kb | RVAEFTTNL     | IPI00123181 | 17886     | Myh9          | myosin, heavy polypeptide 9, non-muscle                           |
| 40 | 713,83 | 2 | 92 | 4177474 | 188411 | 22,2   | n/a    | H2Db | SVMENSKVLGEAM | IPI00465786 | 21894     | Tin1          | talain 1                                                          |
| 41 | 507,29 | 2 | 36 | 796850  | 36000  | 22,1   | 0,0009 | H2Kb | ISYLYNKL      | IPI00121293 | 57259     | Tob2          | transducer of ERBB2, 2                                            |
| 41 | 507,29 | 2 | 36 | 796850  | 36000  | 22,1   | 0,0009 | H2Kb | ISYLYNKL      | IPI00121293 | 22057     | Tob1          | transducer of ErbB-2.1                                            |

|    |        |   |    |          |         |        |        |      |             |             |        |           |                                                                                        |
|----|--------|---|----|----------|---------|--------|--------|------|-------------|-------------|--------|-----------|----------------------------------------------------------------------------------------|
| 42 | 567,77 | 2 | 75 | 42373792 | 2076049 | 20,4   | 0,0092 | H2Db | YAGSNFPEHI  | IPI00177038 | 66713  | Actr2     | ARP2 actin-related protein 2 homolog (yeast)                                           |
| 43 | 527,81 | 2 | 39 | 12264388 | 657047  | 18,7   | 0,0003 | H2Kb | RQYIFSKL    | IPI00227871 | 74558  | Gvin1     | GTPase, very large interferon inducible 1                                              |
| 44 | 485,31 | 2 | 34 | 1089937  | 59766   | 18,2   | 0,0238 | H2Db | AALQNLVKI   | IPI00323881 | 16211  | Kpnb1     | karyopherin (importin) beta 1                                                          |
| 45 | 480,26 | 2 | 40 | 1386867  | 77854   | 17,8   | 0,0889 | H2Db | AANINKESI   | IPI00122743 | 226414 | Dars      | aspartyl-tRNA synthetase                                                               |
| 46 | 481,81 | 2 | 39 | 261937   | 15000   | ≥ 17,5 | 0,0734 | H2Kb | SILRFITI    | IPI00127375 | 17874  | Myd88     | myeloid differentiation primary response gene 88                                       |
| 47 | 468,27 | 2 | 52 | 8225059  | 478984  | 17,2   | 0,0973 | H2Kb | VNVRFSTI    | IPI00122070 | 19252  | Dusp1     | dual specificity phosphatase 1                                                         |
| 48 | 532,75 | 2 | 34 | 249036   | 15000   | ≥ 16,6 | 0,0681 | H2Kb | TTYKYEMI    | IPI00463573 | 223691 | Eif3eip   | eukaryotic translation initiation factor 3, subunit E interacting protein              |
| 49 | 579,30 | 2 | 50 | 3495990  | 226647  | 15,4   | 0,0263 | Qa2  | DLDIRHEF    | IPI00132722 | 11745  | Anxa3     | annexin A3                                                                             |
| 50 | 456,76 | 2 | 44 | 229185   | 15000   | ≥ 15,3 | 0,0064 | H2Kb | KSFLFSAL    | IPI00461438 | 170439 | Elovl6    | ELOVL family member 6, elongation of long chain fatty acids (yeast)                    |
| 51 | 521,28 | 2 | 55 | 2901091  | 194952  | 14,9   | 0,1049 | H2Kb | LQYEFTKL    | IPI00474689 | 71409  | Fmnl2     | formin-like 2                                                                          |
| 51 | 521,28 | 2 | 55 | 2901091  | 194952  | 14,9   | 0,1049 | H2Kb | LQYEFTKL    | IPI00474689 | 22379  | Fmnl3     | formin-like 3                                                                          |
| 52 | 482,28 | 2 | 49 | 6161253  | 418613  | 14,7   | 0,0398 | H2Kb | TSLRFLNL    | IPI00458889 | 434215 | Lrrc32    | leucine rich repeat containing 32                                                      |
| 53 | 525,77 | 2 | 53 | 11387673 | 782044  | 14,6   | 0,0020 | H2Kb | LQYEFTHL    | IPI00131441 | 57778  | Fmnl1     | formin-like 1                                                                          |
| 54 | 490,81 | 2 | 33 | 200879   | 15000   | ≥ 13,4 | n/a    | Qa2  | SVISVIHLI   | IPI00162949 | 52858  | Cdipt     | CDP-diacylglycerol--inositol 3-phosphatidyltransferase (phosphatidylinositol synthase) |
| 55 | 495,74 | 2 | 30 | 200826   | 15000   | ≥ 13,4 | 0,0391 | H2Kb | IAMEFNHL    | IPI00128389 | 19224  | Ptgs1     | prostaglandin-endoperoxide synthase 1                                                  |
| 56 | 484,77 | 2 | 72 | 916462   | 68817   | 13,3   | n/a    | Qa2  | ASIDILHSI   | IPI00222515 | 69077  | Psmd11    | proteasome (prosome, macropain) 26S subunit, non-ATPase, 11                            |
| 57 | 503,78 | 2 | 41 | 1761490  | 132445  | 13,3   | 0,1818 | H2Kb | EIVTFERL    | IPI00122521 | 14359  | Fxr1h     | fragile X mental retardation gene 1, autosomal homolog                                 |
| 58 | 495,27 | 2 | 42 | 26808072 | 2027338 | 13,2   | 0,0162 | H2Db | STIRNAQSI   | IPI00652172 | 17969  | Ncf1      | neutrophil cytosolic factor 1                                                          |
| 59 | 666,31 | 2 | 42 | 196682   | 15000   | ≥ 13,1 | 0,0032 | H2Db | SAPRNQFTTYM | IPI00129741 | 13654  | Egr2      | early growth response 2                                                                |
| 60 | 509,26 | 2 | 44 | 2288829  | 176919  | 12,9   | 0,0184 | H2Kb | FAYRFSNL    | IPI00469755 | 110816 | Pwp2      | PWP2 periodic tryptophan protein homolog (yeast)                                       |
| 61 | 503,33 | 2 | 39 | 204874   | 16000   | 12,8   | n/a    | Qa2  | AILQVLHVL   | IPI00115875 | 224020 | Pi4ka     | phosphatidylinositol 4-kinase, catalytic, alpha polypeptide                            |
| 62 | 465,75 | 2 | 39 | 931036   | 73850   | 12,6   | n/a    | H2Kb | VGITYQHI    | IPI00120322 | 73830  | Eif3k     | eukaryotic translation initiation factor 3, subunit K                                  |
| 63 | 555,29 | 2 | 48 | 8021880  | 637848  | 12,6   | 0,0043 | H2Db | SMVQNRVFL   | IPI00475204 | 94176  | Dock2     | dedicator of cyto-kinesis 2                                                            |
| 64 | 469,79 | 2 | 54 | 1430854  | 116793  | 12,3   | 0,2439 | H2Kb | VFYAVKVL    | IPI00125834 | 20393  | Sgk1      | serum/glucocorticoid regulated kinase 1                                                |
| 65 | 505,28 | 2 | 36 | 879332   | 72617   | 12,1   | 0,0894 | H2Kb | SAPRFLTAF   | IPI00652892 | 233575 | Frag1     | FGF receptor activating protein 1                                                      |
| 66 | 469,26 | 2 | 66 | 25200554 | 2124039 | 11,9   | 0,0186 | H2Kb | VNVDYSKL    | IPI00125929 | 17992  | Ndufa4    | NADH dehydrogenase (ubiquinone) 1 alpha subcomplex, 4                                  |
| 67 | 624,30 | 2 | 55 | 276431   | 23993   | 11,5   | n/a    | H2Kb | VSYWFDQRF   | IPI00108849 | 20442  | St3gal1   | ST3 beta-galactoside alpha-2,3-sialyltransferase 1                                     |
| 68 | 553,76 | 2 | 50 | 172275   | 15000   | ≥ 11,5 | 0,0118 | H2Db | RANQNFDEI   | IPI00624420 | 77480  | Kidins220 | kinase D-interacting substrate 220                                                     |
| 69 | 477,27 | 2 | 30 | 171521   | 15000   | ≥ 11,4 | 0,0002 | H2Db | VSLINAHSL   | IPI00461570 | 268749 | Rnf31     | ring finger protein 31                                                                 |
| 70 | 583,31 | 2 | 30 | 573279   | 50668   | 11,3   | n/a    | H2Db | YTVENAKDII  | IPI00113738 | 22375  | Wars      | tryptophanyl-tRNA synthetase                                                           |
| 71 | 547,75 | 2 | 45 | 1470764  | 131072  | 11,2   | 0,1288 | H2Db | YVLHNSNTM   | IPI00123494 | 21762  | Psmd2     | proteasome (prosome, macropain) 26S subunit, non-ATPase, 2                             |
| 72 | 562,80 | 2 | 72 | 565347   | 50628   | 11,2   | n/a    | H2Db | SAVENILEHL  | IPI00269020 | 121022 | Mrps6     | mitochondrial ribosomal protein S6                                                     |

|    |        |   |    |           |          |        |        |      |             |             |        |         |                                                                        |
|----|--------|---|----|-----------|----------|--------|--------|------|-------------|-------------|--------|---------|------------------------------------------------------------------------|
| 73 | 525,30 | 2 | 54 | 4426653   | 398013   | 11,1   | 0,0039 | H2Db | KTVVNKDV    | IPI00749639 | 19942  | Rpl27   | ribosomal protein L27                                                  |
| 74 | 546,28 | 2 | 46 | 161509    | 15000    | ≥ 10,8 | 0,0015 | H2Db | YMLANLTHL   | IPI00133107 | 66689  | Khl28   | kelch-like 28 (Drosophila)                                             |
| 75 | 480,78 | 2 | 43 | 1038860   | 97779    | 10,6   | 0,0050 | H2Db | KAIVNVIGM   | IPI00623284 | 81898  | Sf3b1   | splicing factor 3b, subunit 1                                          |
| 76 | 511,78 | 2 | 36 | 3037235   | 296617   | 10,2   | 0,1106 | H2Db | KSVENFVSL   | IPI00117274 | 94176  | Dock2   | dedicator of cyto-kinesis 2                                            |
| 77 | 563,34 | 2 | 73 | 6073794   | 602404   | 10,1   | 0,0096 | H2Db | FALANHLIKV  | IPI00126083 | 13660  | Ehd1    | EH-domain containing 1                                                 |
| 77 | 563,34 | 2 | 73 | 6073794   | 602404   | 10,1   | 0,0096 | H2Db | FALANHLIKV  | IPI00126083 | 57440  | Ehd3    | EH-domain containing 3                                                 |
| 78 | 521,32 | 2 | 48 | 14031756  | 1420380  | 9,9    | 0,0030 | H2Db | VSILNRQVL   | IPI00263048 | 101706 | Numa1   | nuclear mitotic apparatus protein 1                                    |
| 79 | 545,80 | 2 | 49 | 591593    | 59989    | 9,9    | 0,0550 | H2Db | VSNLNRQFL   | IPI00130173 | 22200  | Ube1c   | ubiquitin-activating enzyme E1C                                        |
| 79 | 545,80 | 2 | 49 | 591593    | 59989    | 9,9    | 0,0550 | H2Db | VSNLNRQFL   | IPI00130173 | 50995  | Uba2    | ubiquitin-like modifier activating enzyme 2                            |
| 80 | 555,29 | 2 | 44 | 1776196   | 180375   | 9,8    | 0,0214 | Qa2  | QQQQQLHSL   | IPI00462992 | 192191 | Med9    | mediator of RNA polymerase II transcription, subunit 9 homolog (yeast) |
| 81 | 508,77 | 2 | 43 | 1590254   | 162926   | 9,8    | 0,0098 | H2Db | SAVENKQOI   | IPI00314845 | 20620  | Plk2    | polo-like kinase 2 (Drosophila)                                        |
| 82 | 510,79 | 2 | 63 | 6653949   | 684846   | 9,7    | 0,0067 | H2Db | SLITNKVVM   | IPI00607023 | 18950  | Pnp     | purine-nucleoside phosphorylase                                        |
| 83 | 457,76 | 2 | 47 | 112535617 | 11603225 | 9,7    | 0,0023 | H2Kb | ATLVFHNL    | IPI00228955 | 20848  | Stat3   | signal transducer and activator of transcription 3                     |
| 84 | 440,76 | 2 | 63 | 142975    | 15000    | ≥ 9,5  | 0,0444 | H2Kb | VSISFKSL    | IPI00663048 | 14727  | Gp49a   | glycoprotein 49 A                                                      |
| 84 | 440,76 | 2 | 63 | 142975    | 15000    | ≥ 9,5  | 0,0444 | H2Kb | VSISFKSL    | IPI00663048 | 22201  | Uba1    | ubiquitin-like modifier activating enzyme 1                            |
| 85 | 490,26 | 2 | 54 | 10089368  | 1103707  | 9,1    | 0,0174 | H2Kb | QSIEFSRL    | IPI00129276 | 13669  | Eif3s10 | eukaryotic translation initiation factor 3, subunit 10 (theta)         |
| 86 | 577,83 | 2 | 45 | 751757    | 85255    | 8,8    | n/a    | H2Kb | KIFEFKETL   | IPI00226188 | 227541 | Camk1d  | calcium/calmodulin-dependent protein kinase ID                         |
| 87 | 523,77 | 2 | 40 | 131832    | 15000    | ≥ 8,8  | 0,0507 | Qa2  | YSIQGQHTI   | IPI00128904 | 23983  | Pcbp1   | poly(rC) binding protein 1                                             |
| 88 | 479,26 | 2 | 39 | 129686    | 15000    | ≥ 8,6  | 0,0092 | H2Kb | KVYTFNSV    | IPI00127713 | 67972  | Atp2b1  | ATPase, Ca <sup>++</sup> transporting, plasma membrane 1               |
| 88 | 479,26 | 2 | 39 | 129686    | 15000    | ≥ 8,6  | 0,0092 | H2Kb | KVYTFNSV    | IPI00127713 | 11941  | Atp2b2  | ATPase, Ca <sup>++</sup> transporting, plasma membrane 2               |
| 88 | 479,26 | 2 | 39 | 129686    | 15000    | ≥ 8,6  | 0,0092 | H2Kb | KVYTFNSV    | IPI00127713 | 320707 | Atp2b3  | ATPase, Ca <sup>++</sup> transporting, plasma membrane 3               |
| 88 | 479,26 | 2 | 39 | 129686    | 15000    | ≥ 8,6  | 0,0092 | H2Kb | KVYTFNSV    | IPI00127713 | 381290 | Atp2b4  | ATPase, Ca <sup>++</sup> transporting, plasma membrane 4               |
| 89 | 569,28 | 2 | 42 | 128395    | 15000    | ≥ 8,6  | 0,1660 | H2Kb | TNFEYLTHL   | IPI00399954 | 17101  | Lyst    | lysosomal trafficking regulator                                        |
| 90 | 480,74 | 2 | 40 | 2142444   | 258053   | 8,3    | 0,0472 | H2Kb | TSFRYSLS    | IPI00356888 | 319448 | Fndc3a  | fibronectin type III domain containing 3a                              |
| 91 | 465,75 | 2 | 49 | 447882    | 57333    | 7,8    | 0,0073 | H2Db | TGPSNVDKL   | IPI00387390 | 12649  | Chek1   | checkpoint kinase 1 homolog (S. pombe)                                 |
| 92 | 485,27 | 2 | 27 | 116831    | 15000    | ≥ 7,8  | 0,1169 | H2Kb | KAFTYINL    | IPI00124700 | 22042  | Tfrc    | transferrin receptor                                                   |
| 93 | 497,27 | 2 | 66 | 12776823  | 1654672  | 7,7    | 0,0770 | H2Kb | INDFFPKL    | IPI00109932 | 13209  | Ddx6    | DEAD (Asp-Glu-Ala-Asp) box polypeptide 6                               |
| 94 | 499,77 | 2 | 32 | 1900935   | 246770   | 7,7    | 0,0948 | H2Kb | ISFEFRSL    | IPI00113049 | 210582 | Coq10a  | coenzyme Q10 homolog A (yeast)                                         |
| 94 | 499,77 | 2 | 32 | 1900935   | 246770   | 7,7    | 0,0948 | H2Kb | ISFEFRSL    | IPI00113049 | 67876  | Coq10b  | coenzyme Q10 homolog B (S. cerevisiae)                                 |
| 95 | 467,79 | 2 | 31 | 289484    | 37667    | 7,7    | 0,0258 | H2Kb | VILSFRSL    | IPI00319320 | 50884  | Nckap1  | NCK-associated protein 1                                               |
| 96 | 494,25 | 2 | 26 | 115047    | 15000    | ≥ 7,7  | n/a    | H2Kb | SSYNYRVV    | IPI00117630 | 16438  | Itpr1   | inositol 1,4,5-triphosphate receptor 1                                 |
| 97 | 558,79 | 2 | 41 | 6105677   | 800126   | 7,6    | 0,0482 | H2Db | YVHVNRDTL   | IPI00124762 | 59047  | Pnkp    | polynucleotide kinase 3'-phosphatase                                   |
| 98 | 490,76 | 2 | 36 | 5675159   | 749774   | 7,6    | 0,0075 | H2Kb | SGYIYHKL    | IPI00420949 | 19704  | Upf1    | UPF1 regulator of nonsense transcripts homolog (yeast)                 |
| 99 | 665,33 | 2 | 60 | 112840    | 15000    | ≥ 7,5  | 0,0045 | H2Db | SQMTNLQELHL | IPI00350794 | 231549 | Lrrc8d  | leucine rich repeat containing 8D                                      |

|     |        |   |    |          |         |       |        |      |             |             |        |               |                                                                            |
|-----|--------|---|----|----------|---------|-------|--------|------|-------------|-------------|--------|---------------|----------------------------------------------------------------------------|
| 100 | 546,79 | 2 | 49 | 1289095  | 172374  | 7,5   | 0,0489 | H2Db | YKNVNQEVV   | IPI00320165 | 53415  | Htati2        | HIV-1 tat interactive protein 2, homolog (human)                           |
| 101 | 579,28 | 2 | 38 | 518070   | 69364   | 7,5   | 0,0239 | H2Db | YTLRNQDTF   | IPI00554857 | 18626  | Per1          | period homolog 1 (Drosophila)                                              |
| 102 | 483,77 | 2 | 62 | 36755744 | 4936084 | 7,4   | 0,0056 | H2Db | ASVLNVNHI   | IPI00465535 | 81702  | Ankrd17       | ankyrin repeat domain 17                                                   |
| 103 | 530,76 | 2 | 36 | 1615730  | 219039  | 7,4   | 0,0056 | H2Db | SSPSNKFFF   | IPI00462466 | 235626 | Setd2         | SET domain containing 2                                                    |
| 104 | 464,75 | 2 | 47 | 2401123  | 332807  | 7,2   | 0,2597 | H2Kb | SAFSFRTL    | IPI00341601 | 107035 | Fbxo38        | F-box protein 38                                                           |
| 105 | 456,25 | 2 | 63 | 6686479  | 930627  | 7,2   | 0,0024 | H2Db | ASVINGHTL   | IPI00473543 | 329154 | Ankrd44       | ankyrin repeat domain 44                                                   |
| 106 | 491,29 | 2 | 52 | 2959450  | 417161  | 7,1   | 0,1239 | Qa2  | SVLNVLHSL   | IPI00463573 | 223691 | Eif3eip       | eukaryotic translation initiation factor 3, subunit E interacting protein  |
| 107 | 516,29 | 2 | 56 | 7004022  | 1000822 | 7     | 0,0001 | H2Db | ISLKNSQEI   | IPI00227871 | 74558  | Gvin1         | GTPase, very large interferon inducible 1                                  |
| 108 | 495,74 | 2 | 56 | 14695737 | 2149127 | 6,8   | 0,0274 | H2Db | SAPENAVRM   | IPI00127501 | 14790  | Grc10         | gene rich cluster, C10 gene                                                |
| 109 | 478,79 | 2 | 51 | 1591992  | 233484  | 6,8   | 0,0184 | H2Db | VAVVNKVDI   | IPI00742278 | 18145  | Npc1          | Niemann Pick type C1                                                       |
| 110 | 581,79 | 2 | 40 | 100369   | 15000   | ≥ 6,7 | 0,1202 | Qa2  | EFIEVFHEL   | IPI00322431 | 224860 | Plcl2         | phospholipase C-like 2                                                     |
| 111 | 523,29 | 2 | 70 | 53986773 | 8193413 | 6,6   | 0,0277 | H2Db | NSIRNLDTI   | IPI00123202 | 54138  | Atxn10        | ataxin 10                                                                  |
| 112 | 511,29 | 2 | 28 | 4424290  | 679547  | 6,5   | 0,0048 | H2Db | AAITNKYQL   | IPI00127454 | 106298 | Rrn3          | RRN3 RNA polymerase I transcription factor homolog (yeast)                 |
| 113 | 555,80 | 2 | 60 | 4478468  | 694556  | 6,4   | 0,0006 | H2Kb | IGPTYQRL    | IPI00320034 | 231329 | Polr2b        | polymerase (RNA) II (DNA directed) polypeptide B                           |
| 114 | 450,78 | 2 | 48 | 6328638  | 985316  | 6,4   | 0,0316 | H2Db | GAVTNVKVI   | IPI00108271 | 15568  | Elav1         | ELAV (embryonic lethal, abnormal vision, Drosophila)-like 1 (Hu antigen R) |
| 114 | 450,78 | 2 | 48 | 6328638  | 985316  | 6,4   | 0,0316 | H2Db | GAVTNVKVI   | IPI00108271 | 15569  | Elav2         | ELAV (embryonic lethal, abnormal vision, Drosophila)-like 2 (Hu antigen B) |
| 114 | 450,78 | 2 | 48 | 6328638  | 985316  | 6,4   | 0,0316 | H2Db | GAVTNVKVI   | IPI00108271 | 15571  | Elav3         | ELAV (embryonic lethal, abnormal vision, Drosophila)-like 3 (Hu antigen C) |
| 115 | 494,76 | 2 | 34 | 95634    | 15000   | ≥ 6,4 | 0,1584 | H2Kb | ISLDYQHL    | IPI00224519 | 72503  | 2610507B11Rik | RIKEN cDNA 2610507B11 gene                                                 |
| 116 | 536,30 | 2 | 50 | 17404078 | 2734634 | 6,4   | 0,0037 | H2Db | IGIENIHYL   | IPI00626860 | 68995  | Mcts1         | malignant T cell amplified sequence 1                                      |
| 116 | 536,30 | 2 | 50 | 17404078 | 2734634 | 6,4   | 0,0037 | H2Db | IGIENIHYL   | IPI00626860 | 66405  | Mcts2         | malignant T cell amplified sequence 2                                      |
| 117 | 514,27 | 2 | 38 | 95155    | 15000   | ≥ 6,3 | 0,1171 | H2Kb | AVVAFVMKM   | IPI00674528 | 14972  | H2-K1         | histocompatibility 2, K1, K region                                         |
| 118 | 503,77 | 2 | 38 | 2346888  | 370301  | 6,3   | 0,0012 | H2Kb | TTYKYFAL    | IPI00262966 | 214290 | Zcchc6        | zinc finger, CCHC domain containing 6                                      |
| 119 | 435,74 | 2 | 54 | 7201463  | 1150790 | 6,3   | 0,0756 | H2Kb | SGYKFGVL    | IPI00653716 | 68153  | Gtf2e2        | general transcription factor II E, polypeptide 2 (beta subunit)            |
| 120 | 503,78 | 2 | 33 | 217329   | 35500   | 6,1   | n/a    | H2Kb | VTYIFNHL    | IPI00123216 | 107769 | Tm6sf1        | transmembrane 6 superfamily member 1                                       |
| 121 | 555,80 | 2 | 53 | 8017302  | 1311707 | 6,1   | 0,0147 | Qa2  | SQLDREHIL   | IPI00458546 | 22029  | Traf1         | Tnf receptor-associated factor 1                                           |
| 122 | 438,78 | 2 | 43 | 91590    | 15000   | ≥ 6,1 | 0,0396 | H2Kb | AIIAFKTL    | IPI00170221 | 73341  | Arhgef6       | Rac/Cdc42 guanine nucleotide exchange factor (GEF) 6                       |
| 123 | 539,29 | 2 | 43 | 3454044  | 574091  | 6     | 0,0397 | Qa2  | TLLNVYHAF   | IPI00128818 | 13204  | Dhx15         | DEAH (Asp-Glu-Ala-His) box polypeptide 15                                  |
| 124 | 532,28 | 2 | 38 | 88234    | 15000   | ≥ 5,9 | 0,1412 | H2Kb | SNLYYKYL    | IPI00135233 | 56697  | Akap10        | A kinase (PRKA) anchor protein 10                                          |
| 125 | 681,37 | 2 | 64 | 87789    | 15000   | ≥ 5,9 | n/a    | H2Db | YQLVNSIFQHL | IPI00751623 | 74558  | Gvin1         | GTPase, very large interferon inducible 1                                  |
| 126 | 560,31 | 2 | 42 | 11805196 | 2026677 | 5,8   | 0,0018 | H2Db | AAIRNYGIEL  | IPI00123775 | 17769  | Mthfr         | 5,10-methylenetetrahydrofolate reductase                                   |
| 127 | 422,24 | 2 | 39 | 86037    | 15000   | ≥ 5,7 | n/a    | H2Kb | AIVSFAHV    | IPI00118158 | 17685  | Msh2          | mutS homolog 2 (E. coli)                                                   |

|     |        |   |    |          |         |       |        |      |             |             |        |               |                                                                                          |
|-----|--------|---|----|----------|---------|-------|--------|------|-------------|-------------|--------|---------------|------------------------------------------------------------------------------------------|
| 128 | 465,77 | 2 | 31 | 85884    | 15000   | ≥ 5,7 | 0,0623 | H2Db | LSVRNGATL   | IPI00128366 | 170826 | Ppargc1b      | peroxisome proliferative activated receptor, gamma, coactivator 1 beta                   |
| 129 | 496,32 | 2 | 64 | 1828535  | 322130  | 5,7   | 0,1475 | Qa2  | IVIGVLHQL   | IPI00114852 | 21428  | Mlx           | MAX-like protein X                                                                       |
| 130 | 563,77 | 2 | 35 | 84476    | 15000   | ≥ 5,6 | 0,0181 | H2Db | SQVRNNVYM   | IPI00330961 | 14411  | Slc6a12       | solute carrier family 6 (neurotransmitter transporter, betaine/GABA), member 12          |
| 131 | 465,77 | 2 | 47 | 4102305  | 728523  | 5,6   | 0,0218 | H2Db | ASLVNADKL   | IPI00321497 | 233405 | Vps33b        | vacuolar protein sorting 33B (yeast)                                                     |
| 132 | 490,76 | 2 | 47 | 2084226  | 380550  | 5,5   | 0,0194 | H2Kb | SNIQYRSL    | IPI00229599 | 215690 | Nav1          | neuron navigator 1                                                                       |
| 133 | 526,79 | 2 | 27 | 3167245  | 583437  | 5,4   | 0,0018 | H2Db | FAPKNIYSI   | IPI00108003 | 12978  | Csf1r         | colony stimulating factor 1 receptor                                                     |
| 134 | 558,80 | 2 | 50 | 680742   | 126667  | 5,4   | 0,0225 | H2Db | SQLKNADVEL  | IPI00753468 | 11772  | Ap2a2         | adaptor protein complex AP-2, alpha 2 subunit                                            |
| 135 | 461,27 | 2 | 53 | 9480546  | 1767412 | 5,4   | 0,0634 | H2Kb | QSIVFKSL    | IPI00652317 | 11630  | Aim1          | absent in melanoma 1                                                                     |
| 136 | 503,77 | 2 | 40 | 14069564 | 2637800 | 5,3   | n/a    | H2Kb | ISFKFDHL    | IPI00330063 | 12340  | Capza1        | capping protein (actin filament) muscle Z-line, alpha 1                                  |
| 137 | 569,27 | 2 | 49 | 77526    | 15000   | ≥ 5,2 | 0,0983 | H2Kb | NTYNYKSTF   | IPI00116309 | 97112  | Nmd3          | NMD3 homolog (S. cerevisiae)                                                             |
| 138 | 530,27 | 2 | 33 | 76976    | 15000   | ≥ 5,1 | n/a    | H2Kb | MSYLFRNI    | IPI00153950 | 212627 | Prpsap2       | phosphoribosyl pyrophosphate synthetase-associated protein 2                             |
| 139 | 543,78 | 2 | 27 | 454923   | 88859   | 5,1   | 0,0100 | H2Db | YTVANKEYV   | IPI00321744 | 67458  | Ergic1        | endoplasmic reticulum-golgi intermediate compartment (ERGIC) 1                           |
| 140 | 534,77 | 2 | 47 | 2293267  | 448006  | 5,1   | n/a    | H2Db | QTVENVEHL   | IPI00269223 | 75425  | 2610036D13Rik | RIKEN cDNA 2610036D13 gene                                                               |
| 141 | 510,80 | 2 | 36 | 818888   | 161119  | 5,1   | 0,2405 | H2Kb | IVYKVVNV    | IPI00119320 | 27060  | Tcirg1        | T-cell, immune regulator 1, ATPase, H+ transporting, lysosomal V0 protein A3             |
| 142 | 466,77 | 2 | 33 | 3217624  | 633719  | 5,1   | 0,0593 | H2Db | GSLKNVTTL   | IPI00454039 | 59079  | Erb2ip        | Erb2 interacting protein                                                                 |
| 143 | 549,28 | 2 | 49 | 902930   | 178935  | 5     | 0,0459 | H2Db | NAPQNPEKSL  | IPI00420697 | 76022  | 5830417I10Rik | RIKEN cDNA 5830417I10 gene                                                               |
| 144 | 631,37 | 2 | 43 | 1717417  | 345408  | 5     | 0,0761 | H2Db | TAVVNRVFDKL | IPI00309379 | 16912  | Psmb9         | proteasome (prosome, macropain) subunit, beta type 9 (large multifunctional peptidase 2) |
| 145 | 551,77 | 2 | 52 | 1618769  | 326593  | 5     | 0,0438 | H2Kb | RNYQFDL     | IPI00457731 | 67465  | Sf3a1         | splicing factor 3a, subunit 1                                                            |
| 146 | 505,29 | 2 | 52 | 350771   | 70981   | 4,9   | n/a    | H2Db | VTVLNVDHL   | IPI00124590 | 26885  | Casp8ap2      | caspase 8 associated protein 2                                                           |
| 147 | 458,76 | 2 | 73 | 985900   | 199991  | 4,9   | 0,0169 | H2Db | ASIVNKDGL   | IPI00271799 | 19015  | Ppard         | peroxisome proliferator activator receptor delta                                         |
| 148 | 526,80 | 2 | 39 | 266011   | 55782   | 4,8   | n/a    | Qa2  | EILEVLHSL   | IPI00319965 | 66413  | Psm6          | proteasome (prosome, macropain) 26S subunit, non-ATPase, 6                               |
| 149 | 473,81 | 2 | 40 | 1740629  | 365196  | 4,8   | 0,1401 | H2Kb | VIVRFLTV    | IPI00230660 | 267019 | Rps15a        | ribosomal protein S15a                                                                   |
| 150 | 571,30 | 2 | 66 | 664090   | 140496  | 4,7   | 0,0632 | H2Kb | KTYQFLNDI   | IPI00128482 | 224823 | BC011248      | cDNA sequence BC011248                                                                   |
| 151 | 487,73 | 2 | 58 | 7498251  | 1600516 | 4,7   | 0,2220 | H2Kb | STLTYSRM    | IPI00125834 | 20393  | Sgk1          | serum/glucocorticoid regulated kinase 1                                                  |
| 152 | 496,79 | 2 | 60 | 40343097 | 8640481 | 4,7   | 0,0043 | H2Db | YGLKNLTAL   | IPI00798457 | 83490  | Pik3ap1       | phosphoinositide-3-kinase adaptor protein 1                                              |
| 153 | 593,81 | 2 | 47 | 176635   | 38145   | 4,6   | 0,0621 | H2Db | RALENPTASL  | IPI00464166 | 104831 | Ptpn23        | protein tyrosine phosphatase, non-receptor type 23                                       |
| 154 | 496,76 | 2 | 62 | 29473934 | 6416519 | 4,6   | 0,0043 | H2Db | AAMKNVTEL   | IPI00230707 | 22628  | Ywhag         | 3-monooxygenase/tryptophan 5-monooxygenase activation protein, gamma polypeptide         |
| 155 | 524,78 | 2 | 52 | 4770048  | 1039064 | 4,6   | 0,0153 | H2Kb | VSFTYRYL    | IPI00120923 | 80743  | Vps16         | vacuolar protein sorting 16 (yeast)                                                      |
| 156 | 546,79 | 2 | 54 | 255074   | 57078   | 4,5   | 0,1658 | H2Kb | TIVEFLHSF   | IPI00130157 | 116848 | Baz2a         | bromodomain adjacent to zinc finger domain, 2A                                           |
| 157 | 635,79 | 2 | 66 | 32121773 | 7188670 | 4,5   | 0,0082 | H2Db | SMGKNPTDEYL | IPI00758006 | 67268  | 2900073G15Rik | RIKEN cDNA 2900073G15 gene                                                               |
| 158 | 466,79 | 2 | 29 | 66993    | 15000   | ≥ 4,5 | n/a    | H2Kb | AVIKFLEL    | IPI00118158 | 17685  | Msh2          | mutS homolog 2 (E. coli)                                                                 |

|     |        |   |    |          |         |       |        |      |             |             |        |               |                                                                                                   |
|-----|--------|---|----|----------|---------|-------|--------|------|-------------|-------------|--------|---------------|---------------------------------------------------------------------------------------------------|
| 159 | 469,27 | 2 | 49 | 330632   | 75423   | 4,4   | 0,0002 | H2Kb | SNLKYSLL    | IPI00120860 | 70028  | Dopey2        | dopey family member 2                                                                             |
| 160 | 555,79 | 2 | 36 | 6323471  | 1444711 | 4,4   | 0,0044 | H2Db | SSIQNGKYTL  | IPI00551078 | 338523 | Jhdm1d        | jumonji C domain-containing histone demethylase 1 homolog D ( <i>S. cerevisiae</i> )              |
| 161 | 590,79 | 2 | 51 | 36044628 | 8307834 | 4,3   | 0,0041 | H2Db | SAPRNFVENF  | IPI00461189 | 58523  | Elp2          | elongation protein 2 homolog ( <i>S. cerevisiae</i> )                                             |
| 162 | 487,76 | 2 | 27 | 2330731  | 540269  | 4,3   | 0,0938 | H2Db | AALENDKTI   | IPI00110312 | 140858 | Wdr5          | WD repeat domain 5                                                                                |
| 162 | 487,76 | 2 | 27 | 2330731  | 540269  | 4,3   | 0,0938 | H2Db | AALENDKTI   | IPI00110312 | 69544  | Wdr5b         | WD repeat domain 5B                                                                               |
| 163 | 543,78 | 2 | 44 | 33624179 | 7820120 | 4,3   | 0,0206 | H2Db | FGIHNGVETL  | IPI00223864 | 74182  | Prei4         | preimplantation protein 4                                                                         |
| 164 | 505,28 | 2 | 26 | 810986   | 191114  | 4,2   | 0,3220 | H2Kb | RVLIFSQM    | IPI00396802 | 12648  | Chd1          | chromodomain helicase DNA binding protein 1                                                       |
| 164 | 505,28 | 2 | 26 | 810986   | 191114  | 4,2   | 0,3220 | H2Kb | RVLIFSQM    | IPI00396802 | 244059 | Chd2          | chromodomain helicase DNA binding protein 2                                                       |
| 164 | 505,28 | 2 | 26 | 810986   | 191114  | 4,2   | 0,3220 | H2Kb | RVLIFSQM    | IPI00396802 | 216848 | Chd3          | chromodomain helicase DNA binding protein 3                                                       |
| 164 | 505,28 | 2 | 26 | 810986   | 191114  | 4,2   | 0,3220 | H2Kb | RVLIFSQM    | IPI00396802 | 107932 | Chd4          | chromodomain helicase DNA binding protein 4                                                       |
| 164 | 505,28 | 2 | 26 | 810986   | 191114  | 4,2   | 0,3220 | H2Kb | RVLIFSQM    | IPI00396802 | 269610 | Chd5          | chromodomain helicase DNA binding protein 5                                                       |
| 164 | 505,28 | 2 | 26 | 810986   | 191114  | 4,2   | 0,3220 | H2Kb | RVLIFSQM    | IPI00396802 | 320790 | Chd7          | chromodomain helicase DNA binding protein 7                                                       |
| 164 | 505,28 | 2 | 26 | 810986   | 191114  | 4,2   | 0,3220 | H2Kb | RVLIFSQM    | IPI00396802 | 93761  | Smarca1       | SWI/SNF related, matrix associated, actin dependent regulator of chromatin, subfamily a, member 1 |
| 164 | 505,28 | 2 | 26 | 810986   | 191114  | 4,2   | 0,3220 | H2Kb | RVLIFSQM    | IPI00396802 | 93762  | Smarca5       | SWI/SNF related, matrix associated, actin dependent regulator of chromatin, subfamily a, member 5 |
| 165 | 449,24 | 2 | 64 | 3375703  | 816049  | 4,1   | 0,0045 | H2Db | ISGVNGTHI   | IPI00387234 | 20815  | Srpk1         | serine/arginine-rich protein specific kinase 1                                                    |
| 166 | 490,30 | 2 | 43 | 61464    | 15000   | ≥ 4,1 | n/a    | H2Kb | KVLVFNFL    | IPI00308184 | 102566 | Tmem16k       | transmembrane protein 16K                                                                         |
| 167 | 634,84 | 2 | 53 | 470712   | 115333  | 4,1   | 0,0844 | H2Db | FVISNYREQL  | IPI00317217 | 67392  | 4833420G17Rik | RIKEN cDNA 4833420G17 gene                                                                        |
| 168 | 462,26 | 2 | 40 | 3276975  | 809774  | 4     | 0,0364 | H2Kb | KSLTFTNL    | IPI00756323 | 65969  | Cubn          | cubilin (intrinsic factor-cobalamin receptor)                                                     |
| 169 | 578,82 | 2 | 33 | 353890   | 90003   | 3,9   | 0,0443 | H2Db | NSVNPKNKATI | IPI00331301 | 54644  | Otud5         | OTU domain containing 5                                                                           |
| 170 | 526,32 | 2 | 34 | 58131    | 15000   | ≥ 3,9 | n/a    | H2Kb | IIVQFRYI    | IPI00221884 | 233280 | Nipa1         | non imprinted in Prader-Willi/Angelman syndrome 1 homolog (human)                                 |
| 171 | 532,81 | 2 | 41 | 2657114  | 688524  | 3,9   | 0,0179 | Qa2  | EQVALVHRL   | IPI00387354 | 12181  | Bop1          | block of proliferation 1                                                                          |
| 172 | 562,79 | 2 | 62 | 1082263  | 280875  | 3,9   | 0,0723 | H2Db | FQKQNVTIM   | IPI00125726 | 18126  | Nos2          | nitric oxide synthase 2, inducible, macrophage                                                    |
| 173 | 535,75 | 2 | 66 | 1360798  | 357528  | 3,8   | 0,0037 | H2Db | LSMRNTSVM   | IPI00677484 | 12176  | Bnip3         | BCL2/adenovirus E1B interacting protein 1, NIP3                                                   |
| 174 | 479,78 | 2 | 43 | 1537438  | 407561  | 3,8   | 0,0461 | H2Db | SAVENVVKL   | IPI00314451 | 85031  | Pla1a         | phospholipase A1 member A                                                                         |
| 175 | 512,29 | 2 | 42 | 349941   | 93362   | 3,7   | n/a    | Qa2  | ALLDQLHTL   | IPI00113730 | 17979  | Ncoa3         | nuclear receptor coactivator 3                                                                    |
| 176 | 547,29 | 2 | 45 | 1528582  | 413711  | 3,7   | 0,0338 | Qa2  | DVINVFHHL   | IPI00123092 | 56706  | Ccn1          | cyclin L1                                                                                         |
| 177 | 474,75 | 2 | 41 | 1825910  | 497712  | 3,7   | 0,1073 | H2Kb | SGYKFFSL    | IPI00131321 | 74781  | Wipi2         | WD repeat domain, phosphoinositide interacting 2                                                  |
| 178 | 522,79 | 2 | 47 | 10783479 | 3064662 | 3,5   | 0,0220 | H2Db | RAIENIDTL   | IPI00129319 | 66385  | Ppp1r7        | protein phosphatase 1, regulatory (inhibitor) subunit 7                                           |



|     |        |   |    |          |          |       |        |      |             |             |           |                    |                                                              |
|-----|--------|---|----|----------|----------|-------|--------|------|-------------|-------------|-----------|--------------------|--------------------------------------------------------------|
| 179 | 489,27 | 2 | 65 | 35462555 | 10090507 | 3,5   | 0,0417 | H2Kb | VNIEFKDL    | IPI00133416 | 11307     | Abcg1              | ATP-binding cassette, sub-family G (WHITE), member 1         |
| 180 | 482,30 | 2 | 41 | 1957937  | 569292   | 3,4   | 0,2928 | H2Kb | TTLIFQKL    | IPI00129426 | 19696     | Rel                | reticuloendotheliosis oncogene                               |
| 181 | 543,77 | 2 | 38 | 318474   | 93007    | 3,4   | n/a    | Qa2  | AQNDIEHLF   | IPI00226564 | 224171    | C330027C09Rik      | RIKEN cDNA C330027C09 gene                                   |
| 182 | 553,76 | 2 | 53 | 249701   | 73233    | 3,4   | n/a    | H2Db | FSLDNSSSHL  | IPI00357440 | 100125587 | OTTMUSG00000007002 | predicted gene, OTTMUSG00000007002                           |
| 183 | 480,76 | 2 | 57 | 500647   | 146960   | 3,4   | 0,3410 | H2Kb | SALGYLHSI   | IPI00228378 | 170755    | Sgk3               | serum/glucocorticoid regulated kinase 3                      |
| 184 | 460,71 | 2 | 46 | 1082666  | 322317   | 3,4   | 0,0719 | H2Kb | SGYKYVGM    | IPI00128941 | 68090     | Yif1a              | Yip1 interacting factor homolog A (S. cerevisiae)            |
| 185 | 579,28 | 2 | 36 | 7068279  | 2108268  | 3,4   | 0,0408 | H2Db | RSLDNGGYYI  | IPI00230138 | 12143     | Blk                | B lymphoid kinase                                            |
| 185 | 579,28 | 2 | 36 | 7068279  | 2108268  | 3,4   | 0,0408 | H2Db | RSLDNGGYYI  | IPI00230138 | 17096     | Lyn                | Yamaguchi sarcoma viral (v-yes-1) oncogene homolog           |
| 186 | 553,78 | 2 | 58 | 6254494  | 1876623  | 3,3   | 0,0387 | H2Kb | KNHEFIATF   | IPI00760055 | 18753     | Prkcd              | protein kinase C, delta                                      |
| 187 | 529,29 | 2 | 38 | 49813    | 15000    | ≥ 3,3 | 0,0644 | Qa2  | NIAETLHFL   | IPI00623570 | 14897     | Trip12             | thyroid hormone receptor interactor 12                       |
| 188 | 506,78 | 2 | 40 | 616667   | 186428   | 3,3   | 0,0029 | H2Db | GAVKNLTYF   | IPI00314673 | 20443     | St3gal4            | ST3 beta-galactoside alpha-2,3-sialyltransferase 4           |
| 189 | 476,78 | 2 | 59 | 457456   | 141204   | 3,2   | 0,1080 | Qa2  | GLLEIAHSL   | IPI00464115 | 320938    | Tnp3               | transportin 3                                                |
| 190 | 523,77 | 2 | 47 | 6574724  | 2052330  | 3,2   | 0,0260 | H2Kb | HIYEFPQL    | IPI00225371 | 106840    | Unc119b            | unc-119 homolog B (C. elegans)                               |
| 191 | 472,78 | 2 | 51 | 829317   | 261967   | 3,2   | 0,0255 | H2Db | VGLINKDSV   | IPI00553465 | 192195    | Ash1l              | ash1 (absent, small, or homeotic)-like (Drosophila)          |
| 192 | 546,26 | 2 | 29 | 288516   | 91752    | 3,1   | n/a    | H2Db | DAIHNFDFL   | IPI00665580 | 224088    | Atp13a3            | ATPase type 13A3                                             |
| 193 | 510,76 | 2 | 44 | 2817509  | 904068   | 3,1   | 0,3795 | H2Kb | STYKFFEVE   | IPI00762267 | 66480     | Rpl15              | ribosomal protein L15                                        |
| 194 | 540,79 | 2 | 54 | 5483080  | 1784688  | 3,1   | 0,1839 | Qa2  | NVIEVEHQL   | IPI00676977 | 16950     | Lox13              | lysyl oxidase-like 3                                         |
| 195 | 475,27 | 2 | 45 | 14863382 | 4848856  | 3,1   | 0,0162 | H2Kb | SVIKFENL    | IPI00132057 | 66980     | Zdhhc6             | zinc finger, DHHC domain containing 6                        |
| 196 | 556,76 | 2 | 34 | 6219583  | 2057745  | 3     | 0,2028 | H2Kb | EIYEFHKM    | IPI00652172 | 17969     | Ncf1               | neutrophil cytosolic factor 1                                |
| 197 | 459,29 | 2 | 28 | 213151   | 70686    | 3     | 0,0656 | H2Kb | VIVKFAQL    | IPI00551454 | 18572     | Pdcd11             | programmed cell death protein 11                             |
| 198 | 464,77 | 2 | 33 | 45108    | 15000    | ≥ 3,0 | 0,1436 | H2Kb | TALNFLHL    | IPI00117183 | 12452     | Ccng2              | cyclin G2                                                    |
| 199 | 551,25 | 2 | 48 | 1837938  | 635734   | 2,9   | 0,0602 | H2Db | FSEENHEPL   | IPI00111181 | 65114     | Vps35              | vacuolar protein sorting 35                                  |
| 200 | 639,87 | 2 | 31 | 316374   | 110254   | 2,9   | n/a    | H2Db | FSPLNPVRVHI | IPI00133916 | 98758     | Hnrpf              | heterogeneous nuclear ribonucleoprotein F                    |
| 200 | 639,87 | 2 | 31 | 316374   | 110254   | 2,9   | n/a    | H2Db | FSPLNPVRVHI | IPI00133916 | 59013     | Hnrph1             | heterogeneous nuclear ribonucleoprotein H1                   |
| 201 | 528,79 | 2 | 56 | 1234899  | 432774   | 2,9   | n/a    | Qa2  | AMLTILHEI   | IPI00762278 | 77987     | Ascc3              | activating signal cointegrator 1 complex subunit 3           |
| 202 | 436,24 | 2 | 28 | 2433837  | 856225   | 2,8   | 0,1314 | H2Kb | ASPIFTHV    | IPI00467423 | 80744     | Cwc22              | CWC22 spliceosome-associated protein homolog (S. cerevisiae) |
| 203 | 472,73 | 2 | 65 | 764360   | 277941   | 2,8   | 0,0504 | H2Kb | SGYDFSRL    | IPI00415905 | 235623    | Scap               | SREBF chaperone                                              |
| 204 | 446,76 | 2 | 48 | 168522   | 61417    | 2,7   | n/a    | H2Kb | AVVSFKEL    | IPI00322431 | 224860    | Plcl2              | phospholipase C-like 2                                       |
| 205 | 433,74 | 2 | 36 | 968823   | 355130   | 2,7   | n/a    | Qa2  | AAPTGTHVL   | IPI00345025 | 223672    | Apol9a             | apolipoprotein L 9a                                          |
| 206 | 475,29 | 2 | 27 | 697402   | 255688   | 2,7   | 0,1199 | H2Kb | SNLKYILV    | IPI00135072 | 29808     | Mga                | MAX gene associated                                          |
| 207 | 470,26 | 2 | 47 | 3013939  | 1114045  | 2,7   | 0,0929 | H2Kb | VAYGFRNI    | IPI00309907 | 67563     | Narfl              | nuclear prelamin A recognition factor-like                   |
| 208 | 516,28 | 2 | 59 | 4395068  | 1640585  | 2,7   | 0,0779 | H2Db | RQLENGTTL   | IPI00266942 | 52635     | D12Erd551e         | DNA segment, Chr 12, ERATO Doi 551, expressed                |
| 209 | 453,77 | 2 | 51 | 3701041  | 1387241  | 2,7   | 0,0126 | H2Kb | SAVIFRTL    | IPI00474393 | 326622    | Upf2               | UPF2 regulator of nonsense transcripts homolog (yeast)       |
| 210 | 477,28 | 2 | 42 | 402906   | 152143   | 2,6   | 0,1438 | H2Kb | AQFKFTVL    | IPI00119305 | 18813     | Pa2g4              | proliferation-associated 2G4                                 |

|     |        |   |    |          |          |       |        |      |             |             |        |          |                                                                                                     |
|-----|--------|---|----|----------|----------|-------|--------|------|-------------|-------------|--------|----------|-----------------------------------------------------------------------------------------------------|
| 211 | 457,76 | 2 | 42 | 384270   | 145208   | 2,6   | 0,0531 | H2Kb | VINSFVHV    | IPI00387216 | 71745  | Cul2     | cullin 2                                                                                            |
| 212 | 659,81 | 2 | 39 | 490480   | 186537   | 2,6   | 0,0487 | H2Db | TSPINPYKDHM | IPI00420464 | 24136  | Zeb2     | zinc finger E-box binding homeobox 2                                                                |
| 213 | 486,76 | 2 | 33 | 1017833  | 388574   | 2,6   | n/a    | H2Kb | EIVSFQHL    | IPI00404595 | 100604 | Lrrc8c   | leucine rich repeat containing 8 family, member C                                                   |
| 214 | 571,30 | 2 | 30 | 238504   | 91538    | 2,6   | 0,0354 | H2Kb | SNIQYITRF   | IPI00124636 | 56715  | Rabgef1  | RAB guanine nucleotide exchange factor (GEF) 1                                                      |
| 215 | 536,77 | 2 | 31 | 32582739 | 12531740 | 2,6   | n/a    | H2Kb | RNYSYEKL    | IPI00229475 | 16480  | Jup      | junction plakoglobin                                                                                |
| 216 | 460,79 | 2 | 41 | 38367    | 15000    | ≥ 2,6 | 0,1045 | H2Kb | SSLKFLLL    | IPI00460651 | 320209 | Ddx11    | DEAD/H (Asp-Glu-Ala-Asp/His) box polypeptide 11 (CHL1-like helicase homolog, <i>S. cerevisiae</i> ) |
| 217 | 435,77 | 2 | 51 | 518782   | 204616   | 2,5   | 0,0587 | H2Db | GAIVNGKVL   | IPI00454161 | 56784  | Garnl1   | GTPase activating RANGAP domain-like 1                                                              |
| 218 | 516,26 | 2 | 43 | 9869988  | 3919416  | 2,5   | 0,0514 | H2Db | FAHTNIESL   | IPI00230108 | 14827  | Pdia3    | protein disulfide isomerase associated 3                                                            |
| 219 | 450,23 | 2 | 42 | 724865   | 288269   | 2,5   | 0,1575 | H2Db | GSLANHTSI   | IPI00135048 | 77573  | Vps33a   | vacuolar protein sorting 33A (yeast)                                                                |
| 220 | 548,28 | 2 | 31 | 450043   | 180589   | 2,5   | 0,2803 | Qa2  | QLLDVEHNL   | IPI00132454 | 66366  | Ergic3   | ERGIC and golgi 3                                                                                   |
| 221 | 541,30 | 2 | 57 | 897701   | 365214   | 2,5   | n/a    | Qa2  | DLIQTIIHEL  | IPI00752114 | 319565 | Syne2    | synaptic nuclear envelope 2                                                                         |
| 222 | 576,28 | 2 | 32 | 1409341  | 574981   | 2,5   | 0,0138 | H2Db | YSVANHNSFL  | IPI00135993 | 74734  | Rhoh     | ras homolog gene family, member H                                                                   |
| 223 | 547,79 | 2 | 43 | 192523   | 78606    | 2,4   | 0,4565 | H2Kb | NVWRFPYL    | IPI00108676 | 56774  | Slc6a14  | solute carrier family 6 (neurotransmitter transporter), member 14                                   |
| 223 | 547,79 | 2 | 43 | 192523   | 78606    | 2,4   | 0,4565 | H2Kb | NVWRFPYL    | IPI00108676 | 103098 | Slc6a15  | solute carrier family 6 (neurotransmitter transporter), member 15                                   |
| 223 | 547,79 | 2 | 43 | 192523   | 78606    | 2,4   | 0,4565 | H2Kb | NVWRFPYL    | IPI00108676 | 74338  | Slc6a19  | solute carrier family 6 (neurotransmitter transporter), member 19                                   |
| 223 | 547,79 | 2 | 43 | 192523   | 78606    | 2,4   | 0,4565 | H2Kb | NVWRFPYL    | IPI00108676 | 102680 | Slc6a20a | solute carrier family 6 (neurotransmitter transporter), member 20A                                  |
| 223 | 547,79 | 2 | 43 | 192523   | 78606    | 2,4   | 0,4565 | H2Kb | NVWRFPYL    | IPI00108676 | 22599  | Slc6a20b | solute carrier family 6 (neurotransmitter transporter), member 20B                                  |
| 223 | 547,79 | 2 | 43 | 192523   | 78606    | 2,4   | 0,4565 | H2Kb | NVWRFPYL    | IPI00108676 | 14411  | Slc6a12  | solute carrier family 6 (neurotransmitter transporter, betaine/GABA), member 12                     |
| 223 | 547,79 | 2 | 43 | 192523   | 78606    | 2,4   | 0,4565 | H2Kb | NVWRFPYL    | IPI00108676 | 102857 | Slc6a8   | solute carrier family 6 (neurotransmitter transporter, creatine), member 8                          |
| 223 | 547,79 | 2 | 43 | 192523   | 78606    | 2,4   | 0,4565 | H2Kb | NVWRFPYL    | IPI00108676 | 13162  | Slc6a3   | solute carrier family 6 (neurotransmitter transporter, dopamine), member 3                          |
| 223 | 547,79 | 2 | 43 | 192523   | 78606    | 2,4   | 0,4565 | H2Kb | NVWRFPYL    | IPI00108676 | 232333 | Slc6a1   | solute carrier family 6 (neurotransmitter transporter, GABA), member 1                              |
| 223 | 547,79 | 2 | 43 | 192523   | 78606    | 2,4   | 0,4565 | H2Kb | NVWRFPYL    | IPI00108676 | 243616 | Slc6a11  | solute carrier family 6 (neurotransmitter transporter, GABA), member 11                             |
| 223 | 547,79 | 2 | 43 | 192523   | 78606    | 2,4   | 0,4565 | H2Kb | NVWRFPYL    | IPI00108676 | 14412  | Slc6a13  | solute carrier family 6 (neurotransmitter transporter, GABA), member 13                             |
| 223 | 547,79 | 2 | 43 | 192523   | 78606    | 2,4   | 0,4565 | H2Kb | NVWRFPYL    | IPI00108676 | 104245 | Slc6a5   | solute carrier family 6 (neurotransmitter transporter, glycine), member 5                           |
| 223 | 547,79 | 2 | 43 | 192523   | 78606    | 2,4   | 0,4565 | H2Kb | NVWRFPYL    | IPI00108676 | 14664  | Slc6a9   | solute carrier family 6 (neurotransmitter transporter, glycine), member 9                           |
| 223 | 547,79 | 2 | 43 | 192523   | 78606    | 2,4   | 0,4565 | H2Kb | NVWRFPYL    | IPI00108676 | 20538  | Slc6a2   | solute carrier family 6 (neurotransmitter transporter, noradrenalin), member 2                      |
| 223 | 547,79 | 2 | 43 | 192523   | 78606    | 2,4   | 0,4565 | H2Kb | NVWRFPYL    | IPI00108676 | 21366  | Slc6a6   | solute carrier family 6 (neurotransmitter transporter, taurine), member 6                           |

|     |        |   |    |          |         |     |        |      |            |             |        |               |                                                                     |
|-----|--------|---|----|----------|---------|-----|--------|------|------------|-------------|--------|---------------|---------------------------------------------------------------------|
| 224 | 559,25 | 2 | 44 | 7814219  | 3191640 | 2,4 | 0,3250 | H2Kb | SNYHIFYSSI | IPI00120388 | 18024  | Nfe2l2        | nuclear factor, erythroid derived 2, like 2                         |
| 225 | 516,28 | 2 | 45 | 18639536 | 7633235 | 2,4 | 0,2136 | H2Kb | AQYKFIYV   | IPI00225419 | 15170  | Ptpn6         | protein tyrosine phosphatase, non-receptor type 6                   |
| 226 | 541,29 | 2 | 60 | 2028967  | 835767  | 2,4 | 0,5685 | H2Db | RQIFNGTFV  | IPI00458337 | 19989  | Rpl7          | ribosomal protein L7                                                |
| 227 | 506,29 | 2 | 28 | 84893    | 23333   | 2,4 | 0,2217 | H2Kb | VIAAFTSRF  | IPI00380785 | 20544  | Slc9a1        | solute carrier family 9 (sodium/hydrogen exchanger), member 1       |
| 228 | 485,78 | 2 | 52 | 7459515  | 3091435 | 2,4 | 0,3152 | H2Kb | SVYVYKVL   | IPI00752556 | 665596 | RP23-38E20.1  | H2b histone family, member A                                        |
| 228 | 485,78 | 2 | 52 | 7459515  | 3091435 | 2,4 | 0,3152 | H2Kb | SVYVYKVL   | IPI00752556 | 319178 | Hist1h2bb     | histone cluster 1, H2bb                                             |
| 228 | 485,78 | 2 | 52 | 7459515  | 3091435 | 2,4 | 0,3152 | H2Kb | SVYVYKVL   | IPI00752556 | 319181 | Hist1h2bg     | histone cluster 1, H2bg                                             |
| 228 | 485,78 | 2 | 52 | 7459515  | 3091435 | 2,4 | 0,3152 | H2Kb | SVYVYKVL   | IPI00752556 | 319182 | Hist1h2bh     | histone cluster 1, H2bh                                             |
| 228 | 485,78 | 2 | 52 | 7459515  | 3091435 | 2,4 | 0,3152 | H2Kb | SVYVYKVL   | IPI00752556 | 319183 | Hist1h2bj     | histone cluster 1, H2bj                                             |
| 228 | 485,78 | 2 | 52 | 7459515  | 3091435 | 2,4 | 0,3152 | H2Kb | SVYVYKVL   | IPI00752556 | 319184 | Hist1h2bk     | histone cluster 1, H2bk                                             |
| 228 | 485,78 | 2 | 52 | 7459515  | 3091435 | 2,4 | 0,3152 | H2Kb | SVYVYKVL   | IPI00752556 | 319186 | Hist1h2bm     | histone cluster 1, H2bm                                             |
| 228 | 485,78 | 2 | 52 | 7459515  | 3091435 | 2,4 | 0,3152 | H2Kb | SVYVYKVL   | IPI00752556 | 319188 | Hist1h2bp     | histone cluster 1, H2bp                                             |
| 228 | 485,78 | 2 | 52 | 7459515  | 3091435 | 2,4 | 0,3152 | H2Kb | SVYVYKVL   | IPI00752556 | 319189 | Hist2h2bb     | histone cluster 2, H2bb                                             |
| 229 | 572,80 | 2 | 54 | 452104   | 188408  | 2,4 | 0,3320 | H2Db | SQLRNADVEL | IPI00622911 | 11771  | Ap2a1         | adaptor protein complex AP-2, alpha 1 subunit                       |
| 230 | 576,29 | 2 | 44 | 2340458  | 984319  | 2,4 | 0,0462 | H2Db | SALENGRYEL | IPI00461396 | 217578 | Baz1a         | bromodomain adjacent to zinc finger domain 1A                       |
| 231 | 491,27 | 2 | 54 | 2483751  | 1051135 | 2,4 | 0,1066 | H2Db | AALENTHLL  | IPI00133355 | 68523  | Fam96b        | family with sequence similarity 96, member B                        |
| 232 | 512,31 | 2 | 61 | 1538833  | 651275  | 2,4 | 0,1018 | Qa2  | KVLDVLHSL  | IPI00339747 | 77877  | 6030458C11Rik | RIKEN cDNA 6030458C11 gene                                          |
| 233 | 509,78 | 2 | 25 | 324243   | 139764  | 2,3 | 0,0958 | H2Db | NQLKNTSTI  | IPI00109932 | 13209  | Ddx6          | DEAD (Asp-Glu-Ala-Asp) box polypeptide 6                            |
| 234 | 505,31 | 2 | 33 | 2117376  | 917189  | 2,3 | 0,5385 | H2Kb | LIYKFLNV   | IPI00395038 | 103573 | Xpo1          | exportin 1, CRM1 homolog (yeast)                                    |
| 235 | 502,29 | 2 | 47 | 372658   | 161852  | 2,3 | n/a    | H2Kb | KVLHFFNV   | IPI00284595 | 69608  | Sec24d        | SEC24 related gene family, member D (S. cerevisiae)                 |
| 236 | 500,79 | 2 | 38 | 8134170  | 3554466 | 2,3 | 0,0224 | H2Db | SAVKNLQQL  | IPI00466915 | 17168  | Mare          | alpha globin regulatory element containing gene                     |
| 237 | 478,26 | 2 | 48 | 1125926  | 494490  | 2,3 | 0,0656 | H2Db | GSLTNLHTL  | IPI00129289 | 110521 | Hivep1        | human immunodeficiency virus type I enhancer binding protein 1      |
| 238 | 463,75 | 2 | 53 | 9212375  | 4052009 | 2,3 | 0,2521 | H2Kb | VAFDFTKV   | IPI00404438 | 233489 | Picalm        | phosphatidylinositol binding clathrin assembly protein              |
| 239 | 544,28 | 2 | 50 | 6970036  | 3101600 | 2,2 | n/a    | H2Db | YVVDNIDHL  | IPI00753518 | 26374  | Rfwd2         | ring finger and WD repeat domain 2                                  |
| 240 | 517,80 | 2 | 65 | 6444588  | 2870549 | 2,2 | 0,1252 | H2Kb | QSIAFISRL  | IPI00607961 | 67878  | Tmem33        | transmembrane protein 33                                            |
| 241 | 484,28 | 2 | 46 | 468586   | 213451  | 2,2 | 0,1093 | H2Db | LGLSNLTHL  | IPI00318748 | 81897  | Tlr9          | toll-like receptor 9                                                |
| 242 | 538,80 | 2 | 59 | 8886586  | 4053684 | 2,2 | 0,0697 | H2Db | RSIQNAQFL  | IPI00154056 | 11432  | Acp2          | acid phosphatase 2, lysosomal                                       |
| 243 | 528,78 | 2 | 51 | 2552874  | 1168351 | 2,2 | 0,1033 | H2Db | IQLMNTAHL  | IPI00120165 | 74114  | Crot          | carnitine O-octanoyltransferase                                     |
| 244 | 507,30 | 2 | 40 | 916220   | 422699  | 2,2 | 0,1014 | H2Db | AKLVNQEVL  | IPI00308882 | 227197 | Ndufs1        | NADH dehydrogenase (ubiquinone) Fe-S protein 1                      |
| 245 | 498,28 | 2 | 49 | 2368489  | 1098655 | 2,2 | n/a    | Qa2  | DLLGTLHNL  | IPI00229328 | 66185  | 1110037F02Rik | RIKEN cDNA 1110037F02 gene                                          |
| 246 | 556,79 | 2 | 50 | 20099606 | 9414809 | 2,1 | 0,3398 | H2Kb | ASYEFVQRL  | IPI00119876 | 13424  | Dync1h1       | dynein cytoplasmic 1 heavy chain 1                                  |
| 247 | 477,23 | 2 | 57 | 919146   | 431577  | 2,1 | 0,0322 | H2Kb | RGPTYVNM   | IPI00420171 | 15463  | Hrb           | HIV-1 Rev binding protein                                           |
| 248 | 522,30 | 2 | 40 | 1395323  | 657500  | 2,1 | 0,2494 | H2Kb | TLNSFIHVL  | IPI00308278 | 68801  | Elov5         | ELOVL family member 5, elongation of long chain fatty acids (yeast) |
| 249 | 561,27 | 2 | 35 | 280407   | 132434  | 2,1 | n/a    | H2Db | VMLENYSHL  | IPI00113254 | 408067 | 9630025I21Rik | RIKEN cDNA 9630025I21 gene                                          |
| 249 | 561,27 | 2 | 35 | 280407   | 132434  | 2,1 | n/a    | H2Db | VMLENYSHL  | IPI00113254 | 67911  | Zfp169        | zinc finger protein 169                                             |

|     |        |   |    |          |          |     |        |      |            |             |        |               |                                                                          |
|-----|--------|---|----|----------|----------|-----|--------|------|------------|-------------|--------|---------------|--------------------------------------------------------------------------|
| 249 | 561,27 | 2 | 35 | 280407   | 132434   | 2,1 | n/a    | H2Db | VMLENYSHL  | IPI00113254 | 22693  | Zfp30         | zinc finger protein 30                                                   |
| 249 | 561,27 | 2 | 35 | 280407   | 132434   | 2,1 | n/a    | H2Db | VMLENYSHL  | IPI00113254 | 245368 | Zfp300        | zinc finger protein 300                                                  |
| 249 | 561,27 | 2 | 35 | 280407   | 132434   | 2,1 | n/a    | H2Db | VMLENYSHL  | IPI00113254 | 328274 | Zfp459        | zinc finger protein 459                                                  |
| 249 | 561,27 | 2 | 35 | 280407   | 132434   | 2,1 | n/a    | H2Db | VMLENYSHL  | IPI00113254 | 235907 | Zfp71-rs1     | zinc finger protein 71, related sequence                                 |
| 249 | 561,27 | 2 | 35 | 280407   | 132434   | 2,1 | n/a    | H2Db | VMLENYSHL  | IPI00113254 | 78251  | Zfp712        | zinc finger protein 712                                                  |
| 249 | 561,27 | 2 | 35 | 280407   | 132434   | 2,1 | n/a    | H2Db | VMLENYSHL  | IPI00113254 | 212276 | Zfp748        | zinc finger protein 748                                                  |
| 249 | 561,27 | 2 | 35 | 280407   | 132434   | 2,1 | n/a    | H2Db | VMLENYSHL  | IPI00113254 | 233056 | Zfp790        | zinc finger protein 790                                                  |
| 249 | 561,27 | 2 | 35 | 280407   | 132434   | 2,1 | n/a    | H2Db | VMLENYSHL  | IPI00113254 | 238693 | Zfp817        | zinc finger protein 817                                                  |
| 249 | 561,27 | 2 | 35 | 280407   | 132434   | 2,1 | n/a    | H2Db | VMLENYSHL  | IPI00113254 | 170763 | Zfp87         | zinc finger protein 87                                                   |
| 249 | 561,27 | 2 | 35 | 280407   | 132434   | 2,1 | n/a    | H2Db | VMLENYSHL  | IPI00113254 | 22754  | Zfp92         | zinc finger protein 92                                                   |
| 250 | 537,29 | 2 | 40 | 61761574 | 29505364 | 2,1 | n/a    | H2Kb | RTYTYEKL   | IPI00125899 | 12387  | Ctnnb1        | catenin (cadherin associated protein), beta 1                            |
| 251 | 498,76 | 2 | 30 | 7922606  | 3805752  | 2,1 | 0,1783 | Qa2  | NQVDSIHAL  | IPI00464181 | 277360 | Prex1         | phosphatidylinositol-3,4,5-trisphosphate-dependent Rac exchange factor 1 |
| 252 | 527,27 | 2 | 52 | 5710784  | 2766557  | 2,1 | 0,0571 | H2Db | SQHVNLQQL  | IPI00228832 | 218978 | D14Erd436e    | DNA segment, Chr 14, ERATO Doi 436, expressed                            |
| 253 | 443,77 | 2 | 36 | 450358   | 220351   | 2   | 0,2587 | H2Db | KALANVATV  | IPI00118674 | 59287  | Ncstn         | nicastatin                                                               |
| 254 | 499,27 | 2 | 27 | 412380   | 202179   | 2   | 0,2865 | H2Kb | VSQYYPKL   | IPI00342766 | 15441  | Hp1bp3        | heterochromatin protein 1, binding protein 3                             |
| 255 | 540,81 | 2 | 60 | 33477408 | 16424022 | 2   | 0,0932 | H2Db | FQIVNPHLL  | IPI00331302 | 20133  | Rrm1          | ribonucleotide reductase M1                                              |
| 256 | 498,75 | 2 | 29 | 911867   | 447469   | 2   | 0,0836 | H2Kb | SSYSFRHL   | IPI00130764 | 54397  | Ppt2          | palmitoyl-protein thioesterase 2                                         |
| 257 | 440,25 | 2 | 36 | 7720015  | 3818328  | 2   | 0,0777 | H2Kb | SGLKYVNV   | IPI00122412 | 108143 | Taf9          | TAF9 RNA polymerase II, TATA box binding protein (TBP)-associated factor |
| 258 | 527,29 | 2 | 45 | 786018   | 389248   | 2   | 0,2679 | Qa2  | ELSDIAHRI  | IPI00221402 | 11674  | Aldoa         | aldolase 1, A isoform                                                    |
| 259 | 514,76 | 2 | 37 | 8373104  | 4163315  | 2   | 0,1065 | H2Db | GALKNTDYF  | IPI00187512 | 107569 | Nt5c3         | 5'-nucleotidase, cytosolic III                                           |
| 260 | 509,31 | 2 | 39 | 410809   | 204923   | 2   | 0,2306 | Qa2  | LQIPIPHSL  | IPI00606087 | 70208  | Med23         | mediator complex subunit 23                                              |
| 261 | 533,82 | 2 | 34 | 446940   | 223981   | 2   | 0,0844 | Qa2  | KQLEVVHTL  | IPI00317684 | 67490  | 1810074P20Rik | RIKEN cDNA 1810074P20 gene                                               |
| 262 | 495,28 | 2 | 37 | 75273    | 38000    | 2   | 0,0148 | H2Db | NTVTNKVTL  | IPI00225578 | 230700 | Foxj3         | forkhead box J3                                                          |
| 263 | 537,79 | 2 | 28 | 316149   | 160471   | 2   | 0,1145 | H2Db | RLITNSEEI  | IPI00135646 | 19299  | Abcd3         | ATP-binding cassette, sub-family D (ALD), member 3                       |
| 264 | 547,28 | 2 | 36 | 246559   | 126485   | 1,9 | 0,0059 | H2Db | FSNKNLEEL  | IPI00223964 | 213550 | Dis3l1        | DIS3 mitotic control homolog (S. cerevisiae)-like                        |
| 265 | 498,75 | 2 | 32 | 191145   | 98333    | 1,9 | 0,1975 | H2Db | YTVKNGDSL  | IPI00380108 | 216131 | Tmem1         | transmembrane protein 1                                                  |
| 266 | 476,27 | 2 | 26 | 306384   | 157820   | 1,9 | n/a    | H2Kb | SNYRVSLI   | IPI00119157 | 110078 | Pygb          | brain glycogen phosphorylase                                             |
| 266 | 476,27 | 2 | 26 | 306384   | 157820   | 1,9 | n/a    | H2Kb | SNYRVSLI   | IPI00119157 | 110095 | Pygl          | liver glycogen phosphorylase                                             |
| 266 | 476,27 | 2 | 26 | 306384   | 157820   | 1,9 | n/a    | H2Kb | SNYRVSLI   | IPI00119157 | 19309  | Pygm          | muscle glycogen phosphorylase                                            |
| 267 | 438,78 | 2 | 55 | 131176   | 68129    | 1,9 | n/a    | H2Kb | VIA SFKVL  | IPI00118899 | 60595  | Actn4         | actinin alpha 4                                                          |
| 268 | 447,26 | 2 | 41 | 273556   | 143175   | 1,9 | 0,1322 | H2Kb | TSIAFKNI   | IPI00128363 | 226778 | Mark1         | MAP/microtubule affinity-regulating kinase 1                             |
| 268 | 447,26 | 2 | 41 | 273556   | 143175   | 1,9 | 0,1322 | H2Kb | TSIAFKNI   | IPI00128363 | 17169  | Mark3         | MAP/microtubule affinity-regulating kinase 3                             |
| 269 | 560,30 | 2 | 32 | 819903   | 429818   | 1,9 | 0,1083 | H2Db | AAYRNLGQNL | IPI00222509 | 108911 | Rcc2          | regulator of chromosome condensation 2                                   |
| 270 | 493,78 | 2 | 72 | 49437184 | 26187050 | 1,9 | 0,0446 | H2Db | KALINADEL  | IPI00753815 | 20740  | Spna2         | spectrin alpha 2                                                         |
| 271 | 470,78 | 2 | 36 | 119650   | 63549    | 1,9 | 0,3671 | H2Kb | VKYLFTGL   | IPI00270877 | 59025  | Usp14         | ubiquitin specific peptidase 14                                          |
| 272 | 456,24 | 2 | 33 | 980218   | 526800   | 1,9 | 0,3346 | H2Kb | AAYGFRNI   | IPI00111842 | 67608  | Narf          | nuclear prelamin A recognition factor                                    |

|     |        |   |    |          |          |     |        |      |             |             |           |                    |                                                                                                 |
|-----|--------|---|----|----------|----------|-----|--------|------|-------------|-------------|-----------|--------------------|-------------------------------------------------------------------------------------------------|
| 273 | 453,77 | 2 | 47 | 321393   | 173949   | 1,8 | n/a    | H2Kb | SALVFTRL    | IPI00459432 | 56700     | 0610031J06Rik      | RIKEN cDNA 0610031J06 gene                                                                      |
| 274 | 571,32 | 2 | 64 | 2186905  | 1208981  | 1,8 | 0,2393 | Qa2  | KFLEQVHQL   | IPI00467004 | 20846     | Stat1              | signal transducer and activator of transcription 1                                              |
| 275 | 483,79 | 2 | 38 | 295786   | 164809   | 1,8 | n/a    | H2Kb | IILKYIGM    | IPI00123519 | 54208     | Arl6ip1            | ADP-ribosylation factor-like 6 interacting protein 1                                            |
| 276 | 463,76 | 2 | 53 | 483782   | 269911   | 1,8 | 0,1796 | H2Kb | ASYLFRGL    | IPI00648936 | 217353    | Tmc6               | transmembrane channel-like gene family 6                                                        |
| 277 | 504,79 | 2 | 29 | 298185   | 168373   | 1,8 | n/a    | Qa2  | AVLEVVEL    | IPI00353935 | 214616    | Spata5l1           | spermatogenesis associated 5-like 1                                                             |
| 278 | 476,25 | 2 | 49 | 1199932  | 683510   | 1,8 | 0,2821 | H2Kb | VSYLFSHV    | IPI00653091 | 19139     | Prps1              | phosphoribosyl pyrophosphate synthetase 1                                                       |
| 278 | 476,25 | 2 | 49 | 1199932  | 683510   | 1,8 | 0,2821 | H2Kb | VSYLFSHV    | IPI00653091 | 75456     | Prps1l1            | phosphoribosyl pyrophosphate synthetase 1-like 1                                                |
| 278 | 476,25 | 2 | 49 | 1199932  | 683510   | 1,8 | 0,2821 | H2Kb | VSYLFSHV    | IPI00653091 | 110639    | Prps2              | phosphoribosyl pyrophosphate synthetase 2                                                       |
| 279 | 516,79 | 2 | 35 | 929774   | 533088   | 1,7 | 0,5801 | H2Db | TSIKNQTQL   | IPI00127274 | 78697     | Pus7               | pseudouridylate synthase 7 homolog (S. cerevisiae)                                              |
| 280 | 507,29 | 2 | 35 | 192232   | 110839   | 1,7 | 0,3593 | H2Db | AGILNHYLI   | IPI00129296 | 11690     | Alox5ap            | arachidonate 5-lipoxygenase activating protein                                                  |
| 281 | 451,72 | 2 | 40 | 202981   | 117299   | 1,7 | n/a    | H2Kb | ANVDFSHL    | IPI00453859 | 54711     | Plagl2             | pleiomorphic adenoma gene-like 2                                                                |
| 282 | 456,25 | 2 | 46 | 2058438  | 1191798  | 1,7 | 0,3558 | H2Kb | VAFAYKNV    | IPI00120826 | 67437     | Ssr3               | signal sequence receptor, gamma                                                                 |
| 283 | 542,78 | 2 | 37 | 802513   | 470139   | 1,7 | 0,5881 | H2Db | LSENGTHTL   | IPI00469323 | 13433     | Dnmt1              | DNA methyltransferase (cytosine-5) 1                                                            |
| 284 | 479,78 | 2 | 49 | 2968193  | 1741834  | 1,7 | 0,1381 | H2Kb | RAPQFINL    | IPI00377615 | 213109    | Phf3               | PHD finger protein 3                                                                            |
| 285 | 512,80 | 2 | 55 | 1196326  | 704515   | 1,7 | 0,4972 | H2Db | RAIPNNQVL   | IPI00754785 | 59022     | Edf1               | endothelial differentiation-related factor 1                                                    |
| 286 | 561,27 | 2 | 37 | 264906   | 156909   | 1,7 | 0,0642 | Qa2  | EQQPQQHNL   | IPI00223001 | 23856     | Dido1              | death inducer-obliterator 1                                                                     |
| 287 | 514,79 | 2 | 47 | 2871484  | 1742138  | 1,6 | 0,3451 | H2Db | GQIQNKVFL   | IPI00676717 | 107182    | Btaf1              | BTAF1 RNA polymerase II, B-TFIID transcription factor-associated, (Mot1 homolog, S. cerevisiae) |
| 288 | 466,28 | 2 | 48 | 1296754  | 792417   | 1,6 | 0,1544 | H2Kb | VSPLFQKL    | IPI00461469 | 216443    | Mars               | methionine-tRNA synthetase                                                                      |
| 289 | 476,27 | 2 | 41 | 16928769 | 10354966 | 1,6 | 0,3536 | H2Kb | TSVRFQTL    | IPI00109529 | 66394     | Nosip              | nitric oxide synthase interacting protein                                                       |
| 290 | 512,77 | 2 | 65 | 4832399  | 3016361  | 1,6 | 0,5028 | H2Db | HLVTNQEAL   | IPI00229277 | 229898    | Gbp5               | guanylate nucleotide binding protein 5                                                          |
| 291 | 538,78 | 2 | 34 | 67229    | 42590    | 1,6 | 0,5854 | H2Db | RQATNQIVM   | IPI00130000 | 19155     | Npepps             | aminopeptidase puromycin sensitive                                                              |
| 292 | 511,79 | 2 | 30 | 1192941  | 757087   | 1,6 | 0,5657 | H2Db | AQLDNIHVL   | IPI00267405 | 235527    | Plscr4             | phospholipid scramblase 4                                                                       |
| 293 | 512,79 | 2 | 49 | 3371118  | 2150166  | 1,6 | 0,2514 | Qa2  | KAIETVHNL   | IPI00758301 | 57314     | Th1l               | TH1-like homolog (Drosophila)                                                                   |
| 294 | 610,85 | 2 | 51 | 960100   | 614097   | 1,6 | n/a    | H2Db | KSLLNKEEFL  | IPI00230372 | 432555    | EG432555           | predicted gene, EG432555                                                                        |
| 294 | 610,85 | 2 | 51 | 960100   | 614097   | 1,6 | n/a    | H2Db | KSLLNKEEFL  | IPI00230372 | 620913    | OTTMUSG00000005523 | predicted gene, OTTMUSG00000005523                                                              |
| 294 | 610,85 | 2 | 51 | 960100   | 614097   | 1,6 | n/a    | H2Db | KSLLNKEEFL  | IPI00230372 | 667214    | RP23-269N23.3      | interferon-inducible GTPase family member                                                       |
| 295 | 467,26 | 2 | 29 | 8430679  | 5394616  | 1,6 | 0,2598 | H2Kb | VGPRYTQL    | IPI00230277 | 26417     | Mapk3              | mitogen-activated protein kinase 3                                                              |
| 296 | 534,25 | 2 | 45 | 196605   | 127524   | 1,5 | 0,5415 | H2Db | SQFPNAEKM   | IPI00117274 | 94176     | Dock2              | dedicator of cyto-kinesis 2                                                                     |
| 297 | 509,81 | 2 | 62 | 1176270  | 770332   | 1,5 | n/a    | H2Kb | SIAAFIQR    | IPI00130381 | 224727    | Bat3               | HLA-B-associated transcript 3                                                                   |
| 298 | 550,75 | 2 | 53 | 15362601 | 10089844 | 1,5 | 0,2784 | H2Kb | SGYDFENRL   | IPI00112093 | 72747     | Ttc39c             | tetratricopeptide repeat domain 39C                                                             |
| 299 | 541,78 | 2 | 34 | 152442   | 100390   | 1,5 | 0,4078 | Qa2  | SQEEIHNH    | IPI00308086 | 12122     | Bid                | BH3 interacting domain death agonist                                                            |
| 300 | 666,82 | 2 | 49 | 1608203  | 1059124  | 1,5 | 0,2353 | H2Db | YGYSNRVVDLM | IPI00465584 | 100041342 | LOC100041342       | glyceraldehyde-3-phosphate dehydrogenase pseudogene                                             |
| 300 | 666,82 | 2 | 49 | 1608203  | 1059124  | 1,5 | 0,2353 | H2Db | YGYSNRVVDLM | IPI00465584 | 100039840 | LOC100039840       | glyceraldehyde-3-phosphate dehydrogenase pseudogene                                             |

|     |        |   |    |           |          |     |        |      |             |             |           |              |                                                                                 |
|-----|--------|---|----|-----------|----------|-----|--------|------|-------------|-------------|-----------|--------------|---------------------------------------------------------------------------------|
| 300 | 666,82 | 2 | 49 | 1608203   | 1059124  | 1,5 | 0,2353 | H2Db | YGYSNRVVDLM | IPI00465584 | 215974    | EG215974     | predicted gene, EG215974                                                        |
| 300 | 666,82 | 2 | 49 | 1608203   | 1059124  | 1,5 | 0,2353 | H2Db | YGYSNRVVDLM | IPI00465584 | 100040109 | LOC100040109 | similar to Glyceraldehyde-3-phosphate dehydrogenase                             |
| 300 | 666,82 | 2 | 49 | 1608203   | 1059124  | 1,5 | 0,2353 | H2Db | YGYSNRVVDLM | IPI00465584 | 100041831 | LOC100041831 | similar to Glyceraldehyde-3-phosphate dehydrogenase (GAPDH)                     |
| 300 | 666,82 | 2 | 49 | 1608203   | 1059124  | 1,5 | 0,2353 | H2Db | YGYSNRVVDLM | IPI00465584 | 100048253 | LOC100048253 | similar to Glyceraldehyde-3-phosphate dehydrogenase (GAPDH)                     |
| 300 | 666,82 | 2 | 49 | 1608203   | 1059124  | 1,5 | 0,2353 | H2Db | YGYSNRVVDLM | IPI00465584 | 100040634 | LOC100040634 | similar to Glyceraldehyde-3-phosphate dehydrogenase (GAPDH)                     |
| 300 | 666,82 | 2 | 49 | 1608203   | 1059124  | 1,5 | 0,2353 | H2Db | YGYSNRVVDLM | IPI00465584 | 100048117 | LOC100048117 | similar to Glyceraldehyde-3-phosphate dehydrogenase (GAPDH)                     |
| 300 | 666,82 | 2 | 49 | 1608203   | 1059124  | 1,5 | 0,2353 | H2Db | YGYSNRVVDLM | IPI00465584 | 100041399 | LOC100041399 | similar to Glyceraldehyde-3-phosphate dehydrogenase (GAPDH)                     |
| 300 | 666,82 | 2 | 49 | 1608203   | 1059124  | 1,5 | 0,2353 | H2Db | YGYSNRVVDLM | IPI00465584 | 100047352 | LOC100047352 | similar to Glyceraldehyde-3-phosphate dehydrogenase (GAPDH)                     |
| 300 | 666,82 | 2 | 49 | 1608203   | 1059124  | 1,5 | 0,2353 | H2Db | YGYSNRVVDLM | IPI00465584 | 100044981 | LOC100044981 | similar to Glyceraldehyde-3-phosphate dehydrogenase (GAPDH)                     |
| 300 | 666,82 | 2 | 49 | 1608203   | 1059124  | 1,5 | 0,2353 | H2Db | YGYSNRVVDLM | IPI00465584 | 100039258 | LOC100039258 | similar to Glyceraldehyde-3-phosphate dehydrogenase (GAPDH)                     |
| 300 | 666,82 | 2 | 49 | 1608203   | 1059124  | 1,5 | 0,2353 | H2Db | YGYSNRVVDLM | IPI00465584 | 640374    | LOC640374    | similar to Glyceraldehyde-3-phosphate dehydrogenase (GAPDH)                     |
| 300 | 666,82 | 2 | 49 | 1608203   | 1059124  | 1,5 | 0,2353 | H2Db | YGYSNRVVDLM | IPI00465584 | 100047129 | LOC100047129 | similar to Glyceraldehyde-3-phosphate dehydrogenase (GAPDH)                     |
| 300 | 666,82 | 2 | 49 | 1608203   | 1059124  | 1,5 | 0,2353 | H2Db | YGYSNRVVDLM | IPI00465584 | 100041236 | LOC100041236 | similar to Glyceraldehyde-3-phosphate dehydrogenase (GAPDH)                     |
| 301 | 479,23 | 2 | 51 | 124127    | 82750    | 1,5 | 0,2863 | H2Kb | RSISFSNM    | IPI00265718 | 18201     | Nsmaf        | neutral sphingomyelinase (N-SMase) activation associated factor                 |
| 302 | 602,30 | 2 | 62 | 708205    | 472468   | 1,5 | 0,5419 | H2Db | SALQNAESDRL | IPI00399663 | 229841    | Cenpe        | centromere protein E                                                            |
| 303 | 517,26 | 2 | 59 | 430140    | 287072   | 1,5 | n/a    | H2Db | LGVTNFBVHM  | IPI00132825 | 239554    | Foxred2      | FAD-dependent oxidoreductase domain containing 2                                |
| 304 | 489,77 | 2 | 40 | 1900764   | 1276634  | 1,5 | 0,4981 | H2Kb | RSYQQALL    | IPI00112201 | 170742    | Sertad3      | SERTA domain containing 3                                                       |
| 305 | 485,26 | 2 | 39 | 463437    | 312424   | 1,5 | 0,5919 | H2Kb | RAYLFNSV    | IPI00110127 | 106369    | Ypel1        | yippee-like 1 (Drosophila)                                                      |
| 305 | 485,26 | 2 | 39 | 463437    | 312424   | 1,5 | 0,5919 | H2Kb | RAYLFNSV    | IPI00110127 | 77864     | Ypel2        | yippee-like 2 (Drosophila)                                                      |
| 305 | 485,26 | 2 | 39 | 463437    | 312424   | 1,5 | 0,5919 | H2Kb | RAYLFNSV    | IPI00110127 | 66090     | Ypel3        | yippee-like 3 (Drosophila)                                                      |
| 305 | 485,26 | 2 | 39 | 463437    | 312424   | 1,5 | 0,5919 | H2Kb | RAYLFNSV    | IPI00110127 | 241525    | Ypel4        | yippee-like 4 (Drosophila)                                                      |
| 306 | 557,30 | 2 | 78 | 825380    | 559698   | 1,5 | 0,3869 | H2Db | KSISNPPGSNL | IPI00621852 | 232341    | Wnk1         | WNK lysine deficient protein kinase 1                                           |
| 307 | 497,75 | 2 | 33 | 435000    | 295094   | 1,5 | n/a    | H2Kb | AQQSYERL    | IPI00761177 | 214459    | Fnbp11       | formin binding protein 1-like                                                   |
| 308 | 454,74 | 2 | 34 | 292977    | 199424   | 1,5 | n/a    | H2Kb | VADKFSEL    | IPI00222306 | 73699     | Ppp2r1b      | protein phosphatase 2 (formerly 2A), regulatory subunit A (PR 65), beta isoform |
| 309 | 460,25 | 2 | 33 | 106463193 | 74360193 | 1,4 | 0,1671 | H2Kb | VGPRYTNL    | IPI00119663 | 26413     | Mapk1        | mitogen-activated protein kinase 1                                              |
| 310 | 547,80 | 2 | 38 | 4537850   | 3200674  | 1,4 | 0,1945 | Qa2  | RLLQEADHL   | IPI00119142 | 66884     | Appbp2       | amyloid beta precursor protein (cytoplasmic tail) binding protein 2             |
| 311 | 535,79 | 2 | 39 | 9104485   | 6439826  | 1,4 | 0,4949 | H2Db | ISGVNRYVY   | IPI00132940 | 54405     | Ndufa1       | NADH dehydrogenase (ubiquinone) 1 alpha subcomplex, 1                           |
| 312 | 589,81 | 2 | 54 | 10009783  | 7150610  | 1,4 | 0,3903 | H2Db | SLGKNPTDAYL | IPI00132705 | 67938     | Mylc2b       | myosin light chain, regulatory B                                                |
| 313 | 560,31 | 2 | 34 | 2931802   | 2107869  | 1,4 | 0,5534 | H2Db | AGVRNPQQHL  | IPI00124287 | 18458     | Pabpc1       | poly A binding protein, cytoplasmic 1                                           |
| 314 | 534,27 | 2 | 34 | 232466    | 168102   | 1,4 | 0,1221 | H2Db | SSVQNKEYL   | IPI00135122 | 100515    | Zfp518b      | zinc finger protein 518B                                                        |

|     |        |   |    |          |          |     |        |      |            |             |        |               |                                                                                                       |
|-----|--------|---|----|----------|----------|-----|--------|------|------------|-------------|--------|---------------|-------------------------------------------------------------------------------------------------------|
| 315 | 460,27 | 2 | 59 | 2020302  | 1471629  | 1,4 | 0,2125 | H2Kb | ATQVYPKL   | IPI00170162 | 107976 | Bre           | brain and reproductive organ-expressed protein                                                        |
| 316 | 492,28 | 2 | 34 | 1670008  | 1241635  | 1,3 | 0,4099 | H2Kb | KGYVFKEL   | IPI00122181 | 170743 | Tlr7          | toll-like receptor 7                                                                                  |
| 317 | 521,25 | 2 | 49 | 28236959 | 21224480 | 1,3 | 0,3215 | H2Db | FGPVNHEEL  | IPI00133537 | 12576  | Cdkn1b        | cyclin-dependent kinase inhibitor 1B                                                                  |
| 318 | 494,78 | 2 | 37 | 685144   | 521588   | 1,3 | 0,4014 | H2Db | TGVTNRDLI  | IPI00330139 | 71435  | Arhgap21      | Rho GTPase activating protein 21                                                                      |
| 319 | 447,77 | 2 | 55 | 315750   | 240409   | 1,3 | 0,6733 | H2Kb | SGLTYIKI   | IPI00134095 | 12211  | Birc6         | baculoviral IAP repeat-containing 6                                                                   |
| 320 | 567,84 | 2 | 37 | 434082   | 335287   | 1,3 | n/a    | Qa2  | QQLQIIHRV  | IPI00154076 | 116748 | Lsm10         | U7 snRNP-specific Sm-like protein LSM10                                                               |
| 321 | 544,79 | 2 | 39 | 6525067  | 5209696  | 1,3 | 0,6023 | Qa2  | GQIKEYHTL  | IPI00756252 | 672511 | LOC672511     | hypothetical LOC672511                                                                                |
| 322 | 552,25 | 2 | 56 | 197324   | 160201   | 1,2 | n/a    | H2Kb | DQIEYHEGL  | IPI00462949 | 75974  | Dock11        | dedicator of cytokinesis 11                                                                           |
| 323 | 548,30 | 2 | 38 | 398108   | 324088   | 1,2 | 0,6699 | H2Db | AGLLNNPHFI | IPI00116331 | 52551  | Sgta          | small glutamine-rich tetratricopeptide repeat (TPR)-containing, alpha                                 |
| 324 | 523,25 | 2 | 49 | 193728   | 158392   | 1,2 | 0,7516 | H2Db | VSVTNEHLM  | IPI00119330 | 22035  | Tnfsf10       | tumor necrosis factor (ligand) superfamily, member 10                                                 |
| 325 | 549,26 | 2 | 60 | 1329501  | 1092659  | 1,2 | 0,7615 | H2Db | RQAENGYMI  | IPI00380280 | 69719  | Cad           | carbamoyl-phosphate synthetase 2, aspartate transcarbamylase, and dihydroorotase                      |
| 326 | 458,75 | 2 | 29 | 540203   | 447434   | 1,2 | 0,7882 | H2Db | AAGINRDSL  | IPI00127227 | 234309 | Cbr4          | carbonyl reductase 4                                                                                  |
| 327 | 462,27 | 2 | 28 | 321274   | 266998   | 1,2 | 0,7001 | Qa2  | NISGVIHAL  | IPI00111558 | 80909  | Gats          | opposite strand transcription unit to Stag3                                                           |
| 328 | 527,28 | 2 | 49 | 114523   | 97283    | 1,2 | n/a    | Qa2  | SELQVLHDI  | IPI00459331 | 70495  | Atp6ap2       | ATPase, H <sup>+</sup> transporting, lysosomal accessory protein 2                                    |
| 329 | 505,27 | 2 | 49 | 5182114  | 4504961  | 1,2 | 0,6861 | H2Db | ISPENHISL  | IPI00471256 | 23992  | Prkra         | protein kinase, interferon inducible double stranded RNA dependent activator                          |
| 330 | 548,79 | 2 | 34 | 418168   | 363730   | 1,1 | 0,6973 | Qa2  | EQSDLVHRI  | IPI00133066 | 66997  | Psmd12        | proteasome (prosome, macropain) 26S subunit, non-ATPase, 12                                           |
| 331 | 462,29 | 2 | 29 | 833120   | 728358   | 1,1 | n/a    | H2Kb | VAFAFKKL   | IPI00420934 | 108960 | Irak2         | interleukin-1 receptor-associated kinase 2                                                            |
| 332 | 526,81 | 2 | 38 | 489790   | 429800   | 1,1 | 0,8531 | Qa2  | TQLIQTHVL  | IPI00153791 | 68979  | Nol11         | nucleolar protein 11                                                                                  |
| 333 | 506,78 | 2 | 42 | 5175757  | 4572904  | 1,1 | 0,8405 | H2Kb | KSYLMNKL   | IPI00474587 | 14468  | Gbp1          | guanylate nucleotide binding protein 1                                                                |
| 333 | 506,78 | 2 | 42 | 5175757  | 4572904  | 1,1 | 0,8405 | H2Kb | KSYLMNKL   | IPI00474587 | 14469  | Gbp2          | guanylate nucleotide binding protein 2                                                                |
| 333 | 506,78 | 2 | 42 | 5175757  | 4572904  | 1,1 | 0,8405 | H2Kb | KSYLMNKL   | IPI00474587 | 229898 | Gbp5          | guanylate nucleotide binding protein 5                                                                |
| 334 | 532,79 | 2 | 42 | 4862683  | 4321543  | 1,1 | 0,8004 | H2Db | RTVENVTVF  | IPI00126072 | 26949  | Vat1          | vesicle amine transport protein 1 homolog (T californica)                                             |
| 335 | 501,29 | 2 | 53 | 86350920 | 77431050 | 1,1 | 0,8643 | Qa1  | AMAPRTLLL  | IPI00110805 | 14964  | H2-D1         | histocompatibility 2, D region locus 1                                                                |
| 335 | 501,29 | 2 | 53 | 86350920 | 77431050 | 1,1 | 0,8643 | Qa1  | AMAPRTLLL  | IPI00110805 | 15007  | H2-Q10        | histocompatibility 2, Q region locus 10                                                               |
| 335 | 501,29 | 2 | 53 | 86350920 | 77431050 | 1,1 | 0,8643 | Qa1  | AMAPRTLLL  | IPI00110805 | 15016  | H2-Q5         | histocompatibility 2, Q region locus 5                                                                |
| 336 | 555,28 | 2 | 46 | 9384195  | 8416125  | 1,1 | 0,6561 | Qa2  | TQDHVMHLL  | IPI00762266 | 16149  | Cd74          | CD74 antigen (invariant polypeptide of major histocompatibility complex, class II antigen-associated) |
| 337 | 540,31 | 2 | 38 | 346728   | 315296   | 1,1 | 0,8370 | H2Kb | VAYKFPELL  | IPI00405095 | 224826 | Ubr2          | ubiquitin protein ligase E3 component n-recognin 2                                                    |
| 338 | 446,26 | 2 | 49 | 449548   | 409452   | 1,1 | 0,7588 | H2Kb | VNVRFTGV   | IPI00222705 | 75007  | Fam63a        | family with sequence similarity 63, member A                                                          |
| 338 | 446,26 | 2 | 49 | 449548   | 409452   | 1,1 | 0,7588 | H2Kb | VNVRFTGV   | IPI00222705 | 235461 | B230380D07Rik | RIKEN cDNA B230380D07 gene                                                                            |
| 339 | 621,79 | 2 | 43 | 110264   | 100628   | 1,1 | n/a    | H2Db | YAMENTRQTI | IPI00274795 | 20185  | Ncor1         | nuclear receptor co-repressor 1                                                                       |
| 340 | 557,32 | 2 | 37 | 791113   | 727483   | 1,1 | 0,7724 | H2Db | VSPRNSLEVL | IPI00170055 | 242418 | Wdr32         | WD repeat domain 32                                                                                   |

|     |        |   |    |          |          |      |        |      |            |             |        |               |                                                                                      |
|-----|--------|---|----|----------|----------|------|--------|------|------------|-------------|--------|---------------|--------------------------------------------------------------------------------------|
| 341 | 467,28 | 2 | 47 | 90600    | 84764    | 1,1  | n/a    | H2Kb | SQIRFGLL   | IPI00129529 | 16834  | Cog1          | component of oligomeric golgi complex 1                                              |
| 342 | 468,77 | 2 | 37 | 823404   | 783679   | 1,1  | 0,8891 | H2Db | AAIANHQVL  | IPI00311140 | 69192  | Dhx16         | DEAH (Asp-Glu-Ala-His) box polypeptide 16                                            |
| 343 | 601,78 | 2 | 35 | 298372   | 285000   | 1    | n/a    | Qa2  | QQQQEYHEL  | IPI00453673 | 70661  | BC033915      | cDNA sequence BC033915                                                               |
| 344 | 466,27 | 2 | 27 | 1330473  | 1272280  | 1    | 0,9622 | H2Kb | VGYRQPLV   | IPI00124221 | 11933  | Atp1b3        | ATPase, Na <sup>+</sup> /K <sup>+</sup> transporting, beta 3 polypeptide             |
| 345 | 479,26 | 2 | 52 | 1908441  | 1868196  | 1    | 0,9775 | H2Kb | VNSIFQHL   | IPI00227871 | 74558  | Gvin1         | GTPase, very large interferon inducible 1                                            |
| 346 | 506,76 | 2 | 37 | 268350   | 263181   | 1    | 0,9738 | H2Kb | ENFTFQKV   | IPI00760055 | 18753  | Prkcd         | protein kinase C, delta                                                              |
| 347 | 484,79 | 2 | 45 | 194608   | 191005   | 1    | n/a    | H2Kb | ITFIFKSL   | IPI00268673 | 56717  | Frap1         | FK506 binding protein 12- <i>rapamycin</i> associated protein 1                      |
| 348 | 439,75 | 2 | 44 | 891734   | 887694   | 1    | 0,9761 | H2Kb | SGPTYIKL   | IPI00221830 | 57869  | Adck2         | aarF domain containing kinase 2                                                      |
| 349 | 488,24 | 2 | 31 | 182110   | 182465   | -1   | n/a    | H2Kb | NGYKYMAL   | IPI00123814 | 11605  | Gla           | galactosidase, alpha                                                                 |
| 350 | 508,77 | 2 | 47 | 372122   | 376201   | -1   | n/a    | H2Db | RVVANSEEI  | IPI00112111 | 11666  | Abcd1         | ATP-binding cassette, sub-family D (ALD), member 1                                   |
| 351 | 578,76 | 2 | 33 | 85715    | 87287    | -1   | n/a    | H2Kb | VNYHYMSQV  | IPI00134095 | 12211  | Birc6         | baculoviral IAP repeat-containing 6                                                  |
| 352 | 472,75 | 2 | 34 | 175824   | 180665   | -1   | 0,9208 | H2Kb | SSVYFRSV   | IPI00109805 | 72368  | 2310045N01Rik | RIKEN cDNA 2310045N01 gene                                                           |
| 353 | 498,78 | 2 | 38 | 5192335  | 5352892  | -1   | 0,9218 | H2Kb | QALKYFNL   | IPI00131143 | 20338  | Sel1l         | sel-1 suppressor of lin-12-like ( <i>C. elegans</i> )                                |
| 354 | 554,23 | 2 | 34 | 278758   | 288778   | -1   | n/a    | Qa2  | SMMDVDHQI  | IPI00116279 | 12465  | Cct5          | chaperonin subunit 5 (epsilon)                                                       |
| 355 | 479,26 | 2 | 32 | 195881   | 202966   | -1   | 0,9599 | H2Kb | TNVLFNHL   | IPI00109401 | 71919  | Rpap3         | RNA polymerase II associated protein 3                                               |
| 356 | 447,76 | 2 | 34 | 275794   | 286050   | -1   | n/a    | H2Kb | ATLRYASL   | IPI00187397 | 11787  | Apbb2         | amyloid beta (A4) precursor protein-binding, family B, member 2                      |
| 357 | 497,79 | 2 | 39 | 207878   | 215910   | -1   | n/a    | Qa2  | ALNLLLHSL  | IPI00403352 | 233789 | Smg1          | SMG1 homolog, phosphatidylinositol 3-kinase-related kinase ( <i>C. elegans</i> )     |
| 358 | 515,77 | 2 | 41 | 172650   | 181755   | -1,1 | n/a    | Qa2  | SMTLAIHEI  | IPI00113731 | 13244  | Degs1         | degenerative spermatocyte homolog 1 ( <i>Drosophila</i> )                            |
| 359 | 488,75 | 2 | 37 | 137107   | 150456   | -1,1 | 0,8838 | H2Kb | AGPWYRNL   | IPI00475210 | 50771  | Atp9b         | ATPase, class II, type 9B                                                            |
| 360 | 523,26 | 2 | 54 | 220907   | 245984   | -1,1 | n/a    | H2Kb | ATYSYKEAL  | IPI00221621 | 69957  | Cdc16         | CDC16 cell division cycle 16 homolog ( <i>S. cerevisiae</i> )                        |
| 361 | 555,73 | 2 | 45 | 1014439  | 1136004  | -1,1 | 0,8799 | H2Kb | RSYDFEFM   | IPI00329942 | 30930  | Vps26a        | vacuolar protein sorting 26 homolog A (yeast)                                        |
| 362 | 564,28 | 2 | 41 | 323562   | 362795   | -1,1 | 0,8254 | Qa2  | EQLNINHMI  | IPI00311914 | 140630 | Ube4a         | ubiquitination factor E4A, UFD2 homolog ( <i>S. cerevisiae</i> )                     |
| 363 | 526,79 | 2 | 43 | 1249816  | 1402497  | -1,1 | 0,8618 | Qa2  | TLNDLIHNI  | IPI00470092 | 80986  | Ckap2         | cytoskeleton associated protein 2                                                    |
| 364 | 553,30 | 2 | 49 | 1817100  | 2049057  | -1,1 | 0,8815 | H2Kb | INQIYEARV  | IPI00169911 | 216859 | Centb1        | centaurin, beta 1                                                                    |
| 365 | 568,32 | 2 | 32 | 3782659  | 4290597  | -1,1 | 0,7006 | Qa2  | QLLQQQHLL  | IPI00120267 | 108655 | Foxp1         | forkhead box P1                                                                      |
| 365 | 568,32 | 2 | 32 | 3782659  | 4290597  | -1,1 | 0,7006 | Qa2  | QLLQQQHLL  | IPI00120267 | 74123  | Foxp4         | forkhead box P4                                                                      |
| 366 | 517,27 | 2 | 44 | 171784   | 195779   | -1,1 | 0,7523 | H2Db | SAIMNPASKV | IPI00169916 | 67300  | Cltc          | clathrin, heavy polypeptide (Hc)                                                     |
| 367 | 495,75 | 2 | 43 | 1272812  | 1456029  | -1,1 | 0,8333 | H2Kb | SNPEFRQL   | IPI00551078 | 338523 | Jhdm1d        | jumonji C domain-containing histone demethylase 1 homolog D ( <i>S. cerevisiae</i> ) |
| 368 | 462,76 | 2 | 59 | 4670137  | 5916607  | -1,3 | 0,7179 | Qa2  | ALIGVDHSL  | IPI00316214 | 12455  | Ccnt1         | cyclin T1                                                                            |
| 369 | 511,78 | 2 | 39 | 213316   | 272675   | -1,3 | 0,6472 | Qa2  | NQLDGIHLL  | IPI00319214 | 56335  | Mettl3        | methyltransferase-like 3                                                             |
| 370 | 513,29 | 2 | 74 | 12392586 | 16025178 | -1,3 | 0,6720 | Qa2  | GQVVIIHML  | IPI00130444 | 11774  | Ap3b1         | adaptor-related protein complex 3, beta 1 subunit                                    |
| 371 | 526,25 | 2 | 32 | 279780   | 374435   | -1,3 | 0,0794 | H2Db | YMGNTIHSL  | IPI00114801 | 16329  | Inpp1         | inositol polyphosphate-1-phosphatase                                                 |



|     |        |   |    |         |          |      |        |      |             |             |        |               |                                                                                |
|-----|--------|---|----|---------|----------|------|--------|------|-------------|-------------|--------|---------------|--------------------------------------------------------------------------------|
| 372 | 579,78 | 2 | 42 | 3112524 | 4177217  | -1,3 | 0,1882 | Qa2  | YQNQEIHNL   | IPI00453860 | 213895 | Bms1          | BMS1 homolog, ribosome assembly protein (yeast)                                |
| 373 | 456,74 | 2 | 49 | 1296793 | 1763452  | -1,4 | 0,5517 | Qa2  | VSPTGTHTL   | IPI00124640 | 14824  | Gm            | granulin                                                                       |
| 374 | 489,29 | 2 | 62 | 363333  | 501767   | -1,4 | 0,7761 | H2Kb | KILTFDQL    | IPI00665953 | 19899  | Rpl18         | ribosomal protein L18                                                          |
| 375 | 479,30 | 2 | 39 | 772652  | 1074468  | -1,4 | 0,6677 | H2Kb | VNIPFVRL    | IPI00653556 | 98999  | Znfx1         | zinc finger, NFX1-type containing 1                                            |
| 376 | 514,27 | 2 | 70 | 8160127 | 11634092 | -1,4 | n/a    | H2Db | VGIENIHVM   | IPI00123689 | 219135 | Mttr6         | myotubularin related protein 6                                                 |
| 377 | 485,74 | 2 | 29 | 205704  | 300494   | -1,5 | n/a    | H2Kb | NSFRYNGL    | IPI00222547 | 19943  | Rpl28         | ribosomal protein L28                                                          |
| 378 | 539,77 | 2 | 41 | 166202  | 246358   | -1,5 | n/a    | Qa2  | VLSEIMHSF   | IPI00409936 | 70572  | Ranbp5        | RAN binding protein 5                                                          |
| 379 | 516,81 | 2 | 37 | 2195800 | 3291330  | -1,5 | 0,2194 | H2Db | IGTFNVIRL   | IPI00320847 | 15108  | Hsd17b10      | hydroxysteroid (17-beta) dehydrogenase 10                                      |
| 380 | 458,75 | 2 | 35 | 937515  | 1490554  | -1,6 | 0,6068 | H2Kb | STFSFTKV    | IPI00266942 | 52635  | D12Erd551e    | DNA segment, Chr 12, ERATO Doi 551, expressed                                  |
| 381 | 548,23 | 2 | 42 | 67349   | 107237   | -1,6 | 0,3036 | H2Db | MSMTNTHL    | IPI00227508 | 215900 | Fam26f        | family with sequence similarity 26, member F                                   |
| 382 | 493,79 | 2 | 41 | 352711  | 565643   | -1,6 | n/a    | H2Kb | ISILYHQL    | IPI00316471 | 68295  | 0610011L14Rik | RIKEN cDNA 0610011L14 gene                                                     |
| 383 | 489,77 | 2 | 44 | 1725116 | 2776831  | -1,6 | 0,4276 | H2Db | SAALNKDFL   | IPI00118304 | 74081  | Cep350        | centrosomal protein 350                                                        |
| 384 | 524,28 | 2 | 69 | 664396  | 1073572  | -1,6 | 0,3246 | H2Kb | GQVTFLLHVF  | IPI00124382 | 54325  | Elov1         | elongation of very long chain fatty acids (FEN1/Elo2, SUR4/Elo3, yeast)-like 1 |
| 385 | 605,81 | 2 | 48 | 80283   | 132268   | -1,6 | n/a    | H2Db | EVVQNFAGEF  | IPI00132575 | 72042  | Cotl1         | coactosin-like 1 (Dictyostelium)                                               |
| 386 | 517,76 | 2 | 43 | 293737  | 485137   | -1,7 | n/a    | Qa2  | AQSFIHNF    | IPI00461710 | 211255 | Kbtbd7        | kelch repeat and BTB (POZ) domain containing 7                                 |
| 387 | 513,76 | 2 | 47 | 771335  | 1304081  | -1,7 | 0,1762 | Qa2  | ESQSVIHNL   | IPI00284595 | 69608  | Sec24d        | SEC24 related gene family, member D (S. cerevisiae)                            |
| 388 | 547,81 | 2 | 45 | 1377620 | 2333397  | -1,7 | 0,1686 | Qa2  | EIIKDIHNL   | IPI00400016 | 226519 | Lamc1         | laminin, gamma 1                                                               |
| 389 | 424,75 | 2 | 46 | 231364  | 405760   | -1,8 | 0,4015 | H2Kb | SAARFALL    | IPI00125829 | 107723 | Slc12a6       | solute carrier family 12, member 6                                             |
| 390 | 514,80 | 2 | 39 | 974863  | 1752182  | -1,8 | 0,5166 | H2Db | FSPLNPVRV   | IPI00133916 | 98758  | Hnrpf         | heterogeneous nuclear ribonucleoprotein F                                      |
| 390 | 514,80 | 2 | 39 | 974863  | 1752182  | -1,8 | 0,5166 | H2Db | FSPLNPVRV   | IPI00133916 | 59013  | Hnrph1        | heterogeneous nuclear ribonucleoprotein H1                                     |
| 391 | 470,76 | 2 | 56 | 921496  | 1675857  | -1,8 | 0,2595 | Qa2  | ALSEISHAL   | IPI00756605 | 432555 | EG432555      | predicted gene, EG432555                                                       |
| 391 | 470,76 | 2 | 56 | 921496  | 1675857  | -1,8 | 0,2595 | Qa2  | ALSEISHAL   | IPI00756605 | 667214 | RP23-269N23.3 | interferon-inducible GTPase family member                                      |
| 392 | 564,30 | 2 | 33 | 226945  | 420841   | -1,9 | 0,0041 | Qa2  | RLLEEIHAM   | IPI00395196 | 67222  | Srfbp1        | serum response factor binding protein 1                                        |
| 393 | 491,28 | 2 | 39 | 90527   | 176972   | -2   | n/a    | H2Kb | YGVLFRLN    | IPI00221911 | 12508  | Cd53          | CD53 antigen                                                                   |
| 394 | 509,25 | 2 | 35 | 87754   | 175834   | -2   | 0,4580 | H2Db | SSPRNSQEL   | IPI00348883 | 332579 | Card9         | caspase recruitment domain family, member 9                                    |
| 395 | 511,29 | 2 | 49 | 2517357 | 5070687  | -2   | 0,3249 | Qa2  | SQLPVDHIL   | IPI00404856 | 12847  | Copa          | coatamer protein complex subunit alpha                                         |
| 396 | 537,80 | 2 | 47 | 1846975 | 3952174  | -2,1 | 0,3536 | H2Kb | ISPRFDVQL   | IPI00230660 | 267019 | Rps15a        | ribosomal protein S15a                                                         |
| 397 | 508,25 | 2 | 37 | 174667  | 379566   | -2,2 | 0,2138 | Qa2  | AQQNTGHFL   | IPI00132299 | 16364  | Irf4          | interferon regulatory factor 4                                                 |
| 398 | 483,75 | 2 | 28 | 219556  | 482480   | -2,2 | 0,1062 | H2Db | AGIKNSTEF   | IPI00660746 | 100702 | Mpa2l         | macrophage activation 2 like                                                   |
| 399 | 544,28 | 2 | 37 | 1284529 | 2931852  | -2,3 | 0,3326 | Qa2  | FISDVEHQL   | IPI00229742 | 76681  | Trim12        | tripartite motif protein 12                                                    |
| 400 | 575,78 | 2 | 47 | 323333  | 739488   | -2,3 | 0,0738 | H2Db | YVHVNQYDI   | IPI00120503 | 70349  | Copb1         | coatamer protein complex, subunit beta 1                                       |
| 401 | 505,77 | 2 | 26 | 73269   | 170801   | -2,3 | n/a    | H2Kb | SNIRFQFV    | IPI00123689 | 219135 | Mttr6         | myotubularin related protein 6                                                 |
| 402 | 487,73 | 2 | 36 | 193460  | 462680   | -2,4 | n/a    | H2Kb | KSYSFDEV    | IPI00320188 | 59027  | Pbef1         | pre-B-cell colony-enhancing factor 1                                           |
| 403 | 594,34 | 2 | 34 | 23500   | 57092    | -2,4 | n/a    | H2Db | KALINPANVTF | IPI00130018 | 18777  | Lypla1        | lysophospholipase 1                                                            |

|     |        |   |    |         |          |      |        |      |            |             |        |           |                                                                              |
|-----|--------|---|----|---------|----------|------|--------|------|------------|-------------|--------|-----------|------------------------------------------------------------------------------|
| 404 | 480,79 | 2 | 53 | 671080  | 1636329  | -2,4 | 0,4843 | H2Kb | ARIIFNQV   | IPI00116671 | 12044  | Bcl2a1a   | B-cell leukemia/lymphoma 2 related protein A1a                               |
| 404 | 480,79 | 2 | 53 | 671080  | 1636329  | -2,4 | 0,4843 | H2Kb | ARIIFNQV   | IPI00116671 | 12045  | Bcl2a1b   | B-cell leukemia/lymphoma 2 related protein A1b                               |
| 404 | 480,79 | 2 | 53 | 671080  | 1636329  | -2,4 | 0,4843 | H2Kb | ARIIFNQV   | IPI00116671 | 12047  | Bcl2a1d   | B-cell leukemia/lymphoma 2 related protein A1d                               |
| 405 | 524,78 | 2 | 55 | 300466  | 734032   | -2,4 | 0,2364 | H2Kb | INQRFEEL   | IPI00114979 | 20850  | Stat5a    | signal transducer and activator of transcription 5A                          |
| 406 | 512,27 | 2 | 44 | 5232840 | 12904443 | -2,5 | 0,0682 | Qa2  | SQNPTNHLL  | IPI00119320 | 27060  | Tc1rg1    | T-cell, immune regulator 1, ATPase, H+ transporting, lysosomal V0 protein A3 |
| 407 | 534,28 | 2 | 56 | 6187615 | 15857424 | -2,6 | 0,1286 | Qa2  | QLNEQVHSL  | IPI00403682 | 212307 | Mapre2    | microtubule-associated protein, RP/EB family, member 2                       |
| 408 | 476,24 | 2 | 26 | 103333  | 276277   | -2,7 | 0,0917 | H2Kb | RNPTFMGL   | IPI00310131 | 11772  | Ap2a2     | adaptor protein complex AP-2, alpha 2 subunit                                |
| 409 | 600,33 | 2 | 62 | 126887  | 341797   | -2,7 | 0,1693 | H2Db | FALKNPFYSL | IPI00112785 | 60409  | Trappc4   | trafficking protein particle complex 4                                       |
| 410 | 455,26 | 2 | 61 | 424541  | 1219996  | -2,9 | 0,1344 | Qa2  | GALGTLHQL  | IPI00311809 | 20525  | Slc2a1    | solute carrier family 2 (facilitated glucose transporter), member 1          |
| 410 | 455,26 | 2 | 61 | 424541  | 1219996  | -2,9 | 0,1344 | Qa2  | GALGTLHQL  | IPI00311809 | 20526  | Slc2a2    | solute carrier family 2 (facilitated glucose transporter), member 2          |
| 411 | 560,32 | 2 | 48 | 114304  | 334647   | -2,9 | n/a    | H2Db | KQILNIYDL  | IPI00229777 | 71732  | Vps11     | vacuolar protein sorting 11 (yeast)                                          |
| 412 | 512,80 | 2 | 45 | 861220  | 2682909  | -3,1 | 0,0340 | Qa2  | TLTNVIHNL  | IPI00133384 | 66844  | Ormdl2    | ORM1-like 2 ( <i>S. cerevisiae</i> )                                         |
| 413 | 539,30 | 2 | 51 | 4654285 | 15315480 | -3,3 | 0,1335 | H2Kb | TTPEFLTRI  | IPI00462137 | 19225  | Ptgs2     | prostaglandin-endoperoxide synthase 2                                        |
| 414 | 502,29 | 2 | 33 | 1530000 | 5191317  | -3,4 | 0,0122 | H2Kb | QVVQFNRL   | IPI00133047 | 56692  | Map2k1ip1 | mitogen-activated protein kinase 1 interacting protein 1                     |
| 415 | 544,79 | 2 | 34 | 39000   | 141003   | -3,6 | 0,0750 | H2Db | TALKNPNAML | IPI00467447 | 29875  | Iqgap1    | IQ motif containing GTPase activating protein 1                              |
| 416 | 486,30 | 2 | 31 | 102794  | 416454   | -4,1 | n/a    | H2Db | VALLNKTNV  | IPI00125899 | 12387  | Ctnnb1    | catenin (cadherin associated protein), beta 1                                |
| 417 | 575,80 | 2 | 39 | 457532  | 2035291  | -4,4 | 0,0626 | Qa2  | QQQQQHLLI  | IPI00125670 | 94112  | Med15     | mediator complex subunit 15                                                  |

All possible MIP source proteins are shown. MIPs that were not detected on dKO cells were attributed the intensity value 15,000, which represents the threshold for limit of detection. Ratios with the symbol  $\geq$  indicate peptides that were detected above threshold only in WT DCs, and thus, from which the exact fold change could not be measured. P values noted "n/a" correspond to peptides that were detected in 2 out of 3 replicates.

**Supplemental Table S2.** Pathways enriched in MIP source genes from DCs and thymocytes

|                                                     | Pathway Name                                     | ID  | Genes in sample | Genes in InnateDB | P value                          | Gene Symbols                                      |
|-----------------------------------------------------|--------------------------------------------------|-----|-----------------|-------------------|----------------------------------|---------------------------------------------------|
| Pathways enriched in DC peptide source genes        | Acute myeloid leukemia – Myeloid differentiation | 671 | 7               | 57                | 0,0007                           | Frap1, Jup, Mapk1, Mapk3, Ppard, Stat3, Stat5a    |
|                                                     | Proteasome                                       | 630 | 6               | 45                | 0,0011                           | Psmb8, Psmb9, Psmd11, Psmd12, Psmd2, Psmd6        |
|                                                     | Adherens junction                                | 741 | 6               | 74                | 0,0132                           | Actn4, Ctnnb1, Iqgap1, Mapk1, Mapk3, Ptpn6        |
|                                                     | Long-term depression <sup>a</sup>                | 775 | 6               | 75                | 0,0141                           | Itpr1, Lyn, Mapk1, Mapk3, Nos2, Ppp2r1b           |
|                                                     | Toll-like receptor signaling pathway             | 699 | 7               | 99                | 0,0156                           | Map3k7ip2, Mapk1, Mapk3, Myd88, Stat1, Tlr7, Tlr9 |
|                                                     | Nicotinate and nicotinamide metabolism           | 615 | 3               | 24                | 0,0245                           | Nampt, Nt5c3, Pnp1                                |
|                                                     | Pentose phosphate pathway                        | 611 | 3               | 24                | 0,0245                           | Aldoa, Prps1, Prps2                               |
|                                                     | Small cell lung cancer                           | 747 | 6               | 86                | 0,0259                           | Cdk2, Cdkn1b, Lamc1, Nos2, Ptgs2, Traf1           |
|                                                     | Fatty acid elongation in mitochondria            | 668 | 2               | 10                | 0,0273                           | Hsd17b10, Ppt2                                    |
|                                                     | P53 signaling pathway <sup>a</sup>               | 666 | 5               | 65                | 0,0283                           | Bid, Ccng2, Cdk2, Chek1, Pmaip1                   |
|                                                     | Type II diabetes mellitus                        | 641 | 4               | 45                | 0,0304                           | Frap1, Mapk1, Mapk3, Prkcd                        |
|                                                     | Prostate cancer                                  | 773 | 6               | 90                | 0,0315                           | Cdk2, Cdkn1b, Ctnnb1, Frap1, Mapk1, Mapk3         |
|                                                     | Thyroid cancer                                   | 704 | 3               | 28                | 0,0368                           | Ctnnb1, Mapk1, Mapk3                              |
|                                                     | Pancreatic cancer                                | 795 | 5               | 72                | 0,0414                           | Arhgef6, Mapk1, Mapk3, Stat1, Stat3               |
|                                                     | Glycosphingolipid biosynthesis - globoseries     | 760 | 2               | 13                | 0,0449                           | Gla, St3gal1                                      |
| Prion disease                                       | 789                                              | 2   | 13              | 0,0449            | Lamc1, Nfe2l2                    |                                                   |
| Ribosome <sup>a</sup>                               | 756                                              | 5   | 74              | 0,0457            | Rpl18, Rpl28, Rpl4, Rpl7, Rps15a |                                                   |
| Pathways enriched in thymocyte peptide source genes | Tight junction                                   | 607 | 5               | 129               | 0,0127                           | Ash1l, Myh9, Mylc2b, Ppp2r1a, Ppp2r1b             |
|                                                     | Purine metabolism                                | 771 | 5               | 149               | 0,0223                           | Impdh2, Pde2a, Pnp1, Polr2b, Rrm1                 |
|                                                     | Cell cycle                                       | 717 | 4               | 110               | 0,0310                           | Ccnd3, Cdkn1b, Chek1, Pcna                        |
|                                                     | P53 signaling pathway <sup>a</sup>               | 666 | 3               | 65                | 0,0331                           | Ccnd3, Ccng1, Chek1                               |
|                                                     | Renal cell carcinoma                             | 620 | 3               | 70                | 0,0399                           | Cul2, Epas1, Mapk1                                |
|                                                     | Pancreatic cancer                                | 795 | 3               | 72                | 0,0428                           | Arhgef6, Mapk1, Stat3                             |
|                                                     | Ribosome <sup>a</sup>                            | 756 | 3               | 74                | 0,0459                           | Rps15, Rps15a, Rps7                               |
|                                                     | Long-term depression <sup>a</sup>                | 775 | 3               | 75                | 0,0474                           | Mapk1, Ppp2r1a, Ppp2r1b                           |

The InnateDB resource was used to identify enriched KEGG pathways associated to genes coding for MIPs eluted from DCs and thymocytes(1). Only significantly enriched pathways are shown (P < 0.05). <sup>a</sup> Enriched pathways shared between DC and thymocyte datasets.

**Supplemental Table S3.** DC- or immune-related function of genes differentially expressed in WT vs. dKO DCs

| Classification          | Gene ID | Gene Symbol | DC or immune related function                                                                                                         | WT/dKO ratio | P value | References |
|-------------------------|---------|-------------|---------------------------------------------------------------------------------------------------------------------------------------|--------------|---------|------------|
| Resistance to infection | 140780  | Bmp2k       | Level inversely correlated with mouse susceptibility to T cruzi.                                                                      | 20,64        | 0,0000  | (2)        |
|                         | 21672   | Prdx2       | Up-regulated in activated CD8 <sup>+</sup> T cells during HIV infection.                                                              | 11,11        | 0,0002  | (3, 4)     |
|                         | 12774   | Ccr5        | Facilitated infection by HIV.                                                                                                         | 10,71        | 0,0003  | (5, 6)     |
|                         | 80287   | Apobec3     | Level inversely correlated with susceptibility to HIV. Edits viral RNA, mutates DNA.                                                  | 5,59         | 0,0001  | (7, 8)     |
|                         | 12345   | Capzb       | CapG <sup>-/-</sup> mice are more susceptible to Listeria monocytogenes.                                                              | 4,09         | 0,0100  | (9)        |
|                         | 18406   | Orm2        | Binds antiretroviral protease inhibitors and was found increased in HIV patients.                                                     | -6,59        | 0,0045  | (10)       |
|                         | 56066   | Cxcl11      | Inversely correlated with mouse susceptibility to T cruzi. T cell $\alpha$ chemoattractant.                                           | -10,89       | 0,0683  | (2, 11)    |
| Antigen presentation    | 16913   | Psmb8       | Immunoproteasome catalytic subunit (LMP7).                                                                                            | 594,77       | 0,0001  | (12)       |
|                         | 12260   | C1qb        | Enhances antigen presentation to CD8 <sup>+</sup> T cells and phagocytosis by DCs.                                                    | 13,20        | 0,0087  | (13-16)    |
|                         | 13032   | Ctsc        | Activates granzymes A and B, cathepsin family involved in MHC II presentation                                                         | 10,66        | 0,0000  | (17, 18)   |
|                         | 330812  | Rnf150      | Part of E3 ubiquitin ligases family, which was found to affect MHC II traffic in DCs.                                                 | 9,15         | 0,0042  | (19)       |
|                         | 258832  | Olf109      | Part of a cluster of genes in the MHC I region; potential reciprocal influence.                                                       | 5,82         | 0,0006  | (20)       |
|                         | 258503  | Olf98       | Part of a cluster of genes in the MHC I region; potential reciprocal influence.                                                       | 3,66         | 0,0029  | (20)       |
| Phagocytosis            | 245049  | Myrip       | Interacts with myosin VIIA, which is involved in DC endocytosis.                                                                      | 8,44         | 0,0036  | (21)       |
|                         | 11745   | Anxa3       | Ca <sup>2+</sup> and phospholipid-binding protein involved in membrane fusion, aggregation and transport of different vesicles in DCs | 7,56         | 0,0001  | (22)       |
|                         | 20346   | Sema3a      | Suppressed T cell proliferation by inhibiting actin cytoskeleton reorganization.                                                      | 4,80         | 0,0147  | (23-25)    |
|                         | 18784   | Pla2g5      | Regulated phagocytosis and contributed to innate response against C albicans.                                                         | -2,60        | 0,0003  | (26)       |
|                         | 21968   | Tom1        | Binds polyubiquitin chains and recruits clathrin to endosomes.                                                                        | -2,68        | 0,0031  | (27, 28)   |
|                         | 67733   | Itgb3bp     | Binds integrin $\beta$ 3, which is involved in apoptotic body engulfment and exosome endocytosis by DCs.                              | -3,57        | 0,0101  | (29, 30)   |

|                  |        |           |                                                                                                                                              |        |        |          |
|------------------|--------|-----------|----------------------------------------------------------------------------------------------------------------------------------------------|--------|--------|----------|
|                  | 11828  | Aqp3      | Water channel; volume control mechanism during macropinocytosis in DCs.                                                                      | -4,02  | 0,0181 | (31)     |
|                  | 381823 | Apold1    | Link between programmed cell death of host cells (via apoptosis or autophagic death) and immunity to pathogens.                              | -13,24 | 0,0085 | (32)     |
| Immune signaling | 320713 | Mysm1     | Histone 2H de-ubiquitinase that contains Myb-like domains.                                                                                   | 10,31  | 0,0006 | (33)     |
|                  | 27967  | Cherp     | Involved in Ca <sup>2+</sup> mobilization, NFAT activation and cell proliferation (Jurkat Tcells)                                            | 6,72   | 0,0005 | (34)     |
|                  | 231474 | Paqr3     | Adiponectin receptor inhibiting proinflammatory TNF $\alpha$ and inducing anti-inflammatory cytokines (IL-10 and IL-1R $\alpha$ ).           | 5,86   | 0,0016 | (35, 36) |
|                  | 17691  | Snf1lk    | Prevents persistent CREB/TORC1-dependent transcription and is involved in c-Jun activation via MEF2/HDAC4 attenuation.                       | 5,14   | 0,0008 | (37)     |
|                  | 22223  | Uchl1     | Attenuates TNF $\alpha$ -induced NF- $\kappa$ B activity and increases I $\kappa$ B-alpha (vascular cells).                                  | 4,69   | 0,0002 | (38, 39) |
|                  | 494504 | Apcdd1    | Target of the Wnt/ $\beta$ -catenin pathway.                                                                                                 | 4,55   | 0,0028 | (40)     |
|                  | 211228 | Lrrc25    | Contains PI3K-interaction and ITAM motifs; possibly a novel type of pattern-recognition receptor involved in the activation of immune cells. | 3,35   | 0,0163 | (41)     |
|                  | 17268  | Meis1     | Up-regulated by NUP98-HOXA9, and c-Myb is one of its strong targets.                                                                         | 2,57   | 0,0003 | (42, 43) |
|                  | 17863  | Myb       | Activates transcription via CREB binding protein, and p38MAPK delta controls its degradation in response to stress.                          | -2,24  | 0,0000 | (44, 45) |
|                  | 11555  | Adrb2     | Binding to its agonists inhibits LPS-induced IL-18 and IL-12 production in monocytes.                                                        | -2,69  | 0,0005 | (46)     |
|                  | 16163  | Il13      | Up-regulates Fc $\gamma$ RII, a negative regulator of immune response, on DCs.                                                               | -3,04  | 0,0039 | (47)     |
|                  | 19715  | Rex2      | Is a Rac GEF connecting GPCRs, through G $\beta\gamma$ and PI3k, to Rac activation.                                                          | -3,57  | 0,0018 | (48)     |
|                  | 72049  | Tnfrsf13c | B cell activating molecule produced by DCs and modulated by AIRE.                                                                            | -3,76  | 0,0030 | (49)     |
|                  | 21809  | Tgfb3     | Induces tolerance in DCs.                                                                                                                    | -4,44  | 0,0157 | (50)     |
|                  | 20187  | Ryk       | Wnt receptor; Wnt modulates DC maturation.                                                                                                   | -4,51  | 0,0014 | (51)     |
|                  | 12326  | Camk4     | Ca <sup>2+</sup> -dependent signaling cascade comprising CaMK4-CREB-Bcl-2 involved in a DC survival signal implicating TLR4.                 | -4,57  | 0,0027 | (52)     |
|                  | 20347  | Sema3b    | Inhibits the PI3k/Akt pathway through neuropilin-1 (lung and breast cancer cells).                                                           | -5,02  | 0,0050 | (53)     |
|                  | 14268  | Fn1       | Implicated in liver stroma-mediated activation of NK cells via TLR3 signaling.                                                               | -9,67  | 0,0005 | (54)     |

|               |        |         |                                                                                                                                                                                     |       |        |          |
|---------------|--------|---------|-------------------------------------------------------------------------------------------------------------------------------------------------------------------------------------|-------|--------|----------|
| DC Maturation | 23792  | Adam23  | Family members up-regulated during DC maturation.                                                                                                                                   | 4,23  | 0,0012 | (55, 56) |
|               | 107477 | Guca1b  | Family member YC-1 inhibits LPS-induced co-stimulatory molecular expression of DCs by inhibiting Akt activation, I $\kappa$ B $\alpha$ degradation and NF $\kappa$ B translocation. | 3,48  | 0,0080 | (57)     |
|               | 16847  | Lepr    | Receptor of leptin, which activates DCs, induces functional and morphological changes and promotes their survival.                                                                  | -4,11 | 0,0735 | (58, 59) |
|               | 22359  | Vldlr   | Oxidized low-density lipoprotein that induces differentiation of monocytes into DCs.                                                                                                | -4,36 | 0,0656 | (60, 61) |
|               | 16564  | Kif21a  | Kinesin family member; kinesin-2 was found up-regulated during DC maturation.                                                                                                       | -6,03 | 0,0235 | (62)     |
| DC Migration  | 72054  | Cyp4f18 | Induced by LPS in DCs, and inactivates leukotriene B4 (LTB4), a receptor that promotes DC migration.                                                                                | 3,43  | 0,0046 | (63, 64) |
|               | 20856  | Stc2    | Stc1 modulates leukocyte and macrophages migration.                                                                                                                                 | -3,05 | 0,0016 | (65)     |
|               | 15199  | Hebp1   | FL2 (Hepb1-derived peptide) chemoattracts DCs, inhibits LPS-induced maturation.                                                                                                     | -8,67 | 0,0028 | (66)     |
|               | 171167 | Fut10   | Fucosyltransferases mediates emigration of iDCs into inflammation sites.                                                                                                            | -8,68 | 0,0390 | (67)     |

WT/dKO ratio represents the relative intensity detected from WT hybridized samples compared to dKO samples. Negative values represent dKO/WT ratio.

**Supplemental Table S4.** Complete list of genes differentially expressed in WT vs. dKO DCs

| No. | Gene ID | Gene Symbol   | Gene Name                                                                                | WT/dKO ratio | P value |
|-----|---------|---------------|------------------------------------------------------------------------------------------|--------------|---------|
| 1   | 16913   | Psmb8         | proteasome (prosome, macropain) subunit, beta type 8 (large multifunctional peptidase 7) | 594,77       | 0,0001  |
| 2   | 382045  | Gpr114        | G protein-coupled receptor 114                                                           | -62,43       | 0,0007  |
| 3   | 68616   | Gdpd3         | glycerophosphodiester phosphodiesterase domain containing 3                              | -54,75       | 0,0012  |
| 4   | 112422  | 2610305D13Rik | RIKEN cDNA 2610305D13 gene                                                               | -45,12       | 0,0022  |
| 5   | 668581  | EG668581      | predicted gene, EG668581                                                                 | 38,96        | 0,0771  |
| 6   | 19944   | Rpl29         | ribosomal protein L29                                                                    | 33,92        | 0,0013  |
| 7   | 50768   | Dlc1          | deleted in liver cancer 1                                                                | 23,74        | 0,0001  |
| 8   | 109361  | D730005E14Rik | RIKEN cDNA D730005E14 gene                                                               | 22,88        | 0,0002  |
| 9   | 140780  | Bmp2k         | BMP2 inducible kinase                                                                    | 20,64        | 0,0000  |
| 10  | 22351   | Vill          | villin-like                                                                              | 17,35        | 0,0033  |
| 11  | 67878   | Tmem33        | transmembrane protein 33                                                                 | 16,98        | 0,0000  |
| 12  | 232441  | Rerg          | RAS-like, estrogen-regulated, growth-inhibitor                                           | -15,19       | 0,0003  |
| 13  | 546368  | Gm5945        | predicted gene 5945                                                                      | 14,08        | 0,0048  |
| 14  | 667597  | BC023105      | cDNA sequence BC023105                                                                   | -13,88       | 0,0015  |
| 15  | 381823  | Apold1        | apolipoprotein L domain containing 1                                                     | -13,24       | 0,0085  |
| 16  | 12260   | C1qb          | complement component 1, q subcomponent, beta polypeptide                                 | 13,20        | 0,0087  |
| 17  | 57425   | U90926        | cDNA sequence U90926                                                                     | 12,92        | 0,0115  |
| 18  | 73061   | 3110007F17Rik | RIKEN cDNA 3110007F17 gene                                                               | 12,12        | 0,0049  |

|    |        |           |                                                            |        |        |
|----|--------|-----------|------------------------------------------------------------|--------|--------|
| 19 | 56043  | Akr1e1    | aldo-keto reductase family 1, member E1                    | 11,89  | 0,0003 |
| 20 | 382265 | Gm5167    | predicted gene 5167                                        | 11,18  | 0,0048 |
| 21 | 21672  | Prdx2     | peroxiredoxin 2                                            | 11,11  | 0,0002 |
| 22 | 56066  | Cxcl11    | chemokine (C-X-C motif) ligand 11                          | -10,89 | 0,0683 |
| 23 | 12774  | Ccr5      | chemokine (C-C motif) receptor 5                           | 10,71  | 0,0003 |
| 24 | 13032  | Ctsc      | cathepsin C                                                | 10,66  | 0,0000 |
| 25 | 320713 | Mysm1     | myb-like, SWIRM and MPN domains 1                          | 10,31  | 0,0006 |
| 26 | 14768  | Lancl1    | LanC (bacterial lantibiotic synthetase component C)-like 1 | -9,90  | 0,0072 |
| 27 | 56219  | Extl1     | exostoses (multiple)-like 1                                | 9,75   | 0,0008 |
| 28 | 14268  | Fn1       | fibronectin 1                                              | -9,67  | 0,0005 |
| 29 | 236069 | Gm13238   | predicted gene 13238                                       | 9,60   | 0,0000 |
| 30 | 330812 | Rnf150    | ring finger protein 150                                    | 9,15   | 0,0042 |
| 31 | 171167 | Fut10     | fucosyltransferase 10                                      | -8,68  | 0,0390 |
| 32 | 15199  | Hebp1     | heme binding protein 1                                     | -8,67  | 0,0028 |
| 33 | 245049 | Myrip     | myosin VIIA and Rab interacting protein                    | 8,44   | 0,0036 |
| 34 | 70359  | Gtpbp3    | GTP binding protein 3                                      | -7,83  | 0,0025 |
| 35 | 230806 | Aim1l     | absent in melanoma 1-like                                  | -7,78  | 0,0016 |
| 36 | 11745  | Anxa3     | annexin A3                                                 | 7,56   | 0,0001 |
| 37 | 626665 | LOC626665 | similar to zinc finger protein 665                         | -7,51  | 0,0028 |
| 38 | 433762 | LOC433762 | hypothetical gene LOC433762                                | 7,38   | 0,0012 |



|    |        |               |                                                               |       |        |
|----|--------|---------------|---------------------------------------------------------------|-------|--------|
| 39 | 74134  | Cyp2s1        | cytochrome P450, family 2, subfamily s, polypeptide 1         | -7,36 | 0,0121 |
| 40 | 668462 | EG668462      | predicted gene, EG668462                                      | 6,89  | 0,0153 |
| 41 | 433791 | Gm13251       | predicted gene 13251                                          | 6,75  | 0,0000 |
| 42 | 58238  | A830059I20Rik | family with sequence similarity 181, member B                 | -6,72 | 0,0004 |
| 43 | 27967  | Cherp         | calcium homeostasis endoplasmic reticulum protein             | 6,72  | 0,0005 |
| 44 | 18406  | Orm2          | orosomuroid 2                                                 | -6,59 | 0,0045 |
| 45 | 668280 | EG668280      | predicted gene, EG668280                                      | 6,49  | 0,0100 |
| 46 | 83486  | Rbm5          | RNA binding motif protein 5                                   | 6,23  | 0,0004 |
| 47 | 20148  | Dhrs3         | dehydrogenase/reductase (SDR family) member 3                 | 6,21  | 0,0021 |
| 48 | 230848 | Zbtb40        | zinc finger and BTB domain containing 40                      | 6,05  | 0,0001 |
| 49 | 16564  | Kif21a        | kinesin family member 21A                                     | -6,03 | 0,0235 |
| 50 | 231474 | Paqr3         | progesterin and adipoQ receptor family member III             | 5,86  | 0,0016 |
| 51 | 258832 | Olfr109       | olfactory receptor 109                                        | 5,82  | 0,0006 |
| 52 | 433790 | Gm13241       | predicted gene 13241                                          | 5,63  | 0,0010 |
| 53 | 666026 | EG666026      | predicted gene, EG666026                                      | 5,59  | 0,0323 |
| 54 | 80287  | Apobec3       | apolipoprotein B mRNA editing enzyme, catalytic polypeptide 3 | 5,59  | 0,0001 |
| 55 | 70673  | Prdm16        | PR domain containing 16                                       | 5,58  | 0,0002 |
| 56 | 233115 | Dpy19I3       | dpy-19-like 3 (C. elegans)                                    | -5,56 | 0,0043 |
| 57 | 226791 | Lyplal1       | lysophospholipase-like 1                                      | -5,51 | 0,0076 |
| 58 | 72386  | 2610035D17Rik | RIKEN cDNA 2610035D17 gene                                    | 5,48  | 0,0018 |

|    |        |               |                                                                        |       |        |
|----|--------|---------------|------------------------------------------------------------------------|-------|--------|
| 59 | 231510 | Agpat9        | 1-acylglycerol-3-phosphate O-acyltransferase 9                         | -5,40 | 0,0002 |
| 60 | 269211 | BC035947      | cDNA sequence BC035947                                                 | -5,31 | 0,0479 |
| 61 | 71583  | 9130008F23Rik | RIKEN cDNA 9130008F23 gene                                             | 5,27  | 0,0005 |
| 62 | 545248 | EG545248      | predicted gene, EG545248                                               | 5,20  | 0,0110 |
| 63 | 13860  | Eps8          | epidermal growth factor receptor pathway substrate 8                   | 5,17  | 0,0006 |
| 64 | 76508  | 2210015D19Rik | RIKEN cDNA 2210015D19 gene                                             | -5,16 | 0,0000 |
| 65 | 17691  | Sik1          | salt inducible kinase 1                                                | 5,14  | 0,0008 |
| 66 | 381549 | Zfp69         | zinc finger protein 69                                                 | -5,13 | 0,0010 |
|    |        |               | sema domain, immunoglobulin domain (Ig), short basic domain, secreted, |       |        |
| 67 | 20347  | Sema3b        | (semaphorin) 3B                                                        | -5,02 | 0,0050 |
| 68 | 67621  | Bend5         | BEN domain containing 5                                                | -4,91 | 0,0503 |
|    |        |               | sema domain, immunoglobulin domain (Ig), short basic domain, secreted, |       |        |
| 69 | 20346  | Sema3a        | (semaphorin) 3A                                                        | 4,80  | 0,0147 |
| 70 | 667337 | LOC667337     | hypothetical LOC667337                                                 | 4,74  | 0,0004 |
| 71 | 22223  | Uchl1         | ubiquitin carboxy-terminal hydrolase L1                                | 4,69  | 0,0002 |
| 72 | 276829 | Smtnl2        | smoothelin-like 2                                                      | -4,68 | 0,0046 |
| 73 | 69392  | 1700024P12Rik | RIKEN cDNA 1700024P12 gene                                             | 4,66  | 0,0013 |
| 74 | 668645 | Gm9282        | predicted gene 9282                                                    | -4,62 | 0,0013 |
| 75 | 68681  | 1110030E23Rik | RIKEN cDNA 1110030E23 gene                                             | 4,58  | 0,0006 |
| 76 | 12326  | Camk4         | calcium/calmodulin-dependent protein kinase IV                         | -4,57 | 0,0027 |

|    |        |           |                                                             |       |        |
|----|--------|-----------|-------------------------------------------------------------|-------|--------|
| 77 | 494504 | Apcdd1    | adenomatosis polyposis coli down-regulated 1                | 4,55  | 0,0028 |
| 78 | 638940 | EG638940  | predicted gene, EG638940                                    | 4,55  | 0,0017 |
| 79 | 382686 | LOC382686 | RIKEN cDNA 3110053B16 gene                                  | -4,55 | 0,0397 |
| 80 | 97130  | C77080    | expressed sequence C77080                                   | 4,51  | 0,0037 |
| 81 | 20187  | Ryk       | receptor-like tyrosine kinase                               | -4,51 | 0,0014 |
| 82 | 14245  | Lpin1     | lipin 1                                                     | -4,45 | 0,0076 |
| 83 | 21809  | Tgfb3     | transforming growth factor, beta 3                          | -4,44 | 0,0157 |
| 84 | 78923  | Chsy3     | chondroitin sulfate synthase 3                              | -4,43 | 0,0377 |
| 85 | 22359  | Vldlr     | very low density lipoprotein receptor                       | -4,36 | 0,0656 |
| 86 | 104271 | Tex15     | testis expressed gene 15                                    | -4,34 | 0,0005 |
| 87 | 244416 | Ppp1r3b   | protein phosphatase 1, regulatory (inhibitor) subunit 3B    | -4,33 | 0,0008 |
| 88 | 23792  | Adam23    | a disintegrin and metallopeptidase domain 23                | 4,23  | 0,0012 |
| 89 | 73656  | Ms4a6c    | membrane-spanning 4-domains, subfamily A, member 6C         | 4,21  | 0,0003 |
| 90 | 67276  | Eri1      | exoribonuclease 1                                           | -4,17 | 0,0007 |
| 91 | 12331  | Cap1      | CAP, adenylate cyclase-associated protein 1 (yeast)         | -4,14 | 0,0000 |
| 92 | 16847  | Lepr      | leptin receptor                                             | -4,11 | 0,0735 |
| 93 | 12345  | Capzb     | capping protein (actin filament) muscle Z-line, beta        | 4,09  | 0,0100 |
| 94 | 77634  | Snapc3    | small nuclear RNA activating complex, polypeptide 3         | 4,06  | 0,0002 |
| 95 | 26458  | Slc27a2   | solute carrier family 27 (fatty acid transporter), member 2 | -4,05 | 0,0028 |
| 96 | 110877 | Slc18a1   | solute carrier family 18 (vesicular monoamine), member 1    | 4,03  | 0,0002 |

|     |        |               |                                                                            |       |        |
|-----|--------|---------------|----------------------------------------------------------------------------|-------|--------|
| 97  | 11828  | Aqp3          | aquaporin 3                                                                | -4,02 | 0,0181 |
| 98  | 195522 | Zfp691        | zinc finger protein 691                                                    | -4,02 | 0,0024 |
| 99  | 71665  | Fuca1         | fucosidase, alpha-L- 1, tissue                                             | 3,94  | 0,0002 |
| 100 | 666532 | Gm13139       | predicted gene 13139                                                       | 3,93  | 0,0002 |
| 101 | 215772 | 9130014G24Rik | RIKEN cDNA 9130014G24 gene                                                 | 3,90  | 0,0015 |
| 102 | 104383 | Rcor2         | REST corepressor 2                                                         | -3,85 | 0,0038 |
| 103 | 78816  | Gmip          | Gem-interacting protein                                                    | -3,84 | 0,0026 |
| 104 | 239559 | A4galt        | alpha 1,4-galactosyltransferase                                            | -3,83 | 0,0001 |
| 105 | 26382  | Fgd2          | FYVE, RhoGEF and PH domain containing 2                                    | 3,81  | 0,0123 |
| 106 | 72049  | Tnfrsf13c     | tumor necrosis factor receptor superfamily, member 13c                     | -3,76 | 0,0030 |
| 107 | 665081 | EG665081      | predicted gene, EG665081                                                   | 3,76  | 0,0046 |
| 108 | 625719 | EG625719      | predicted gene, EG625719                                                   | 3,75  | 0,0026 |
| 109 | 228576 | Mall          | mal, T-cell differentiation protein-like                                   | -3,72 | 0,0060 |
| 110 | 234353 | Psd3          | pleckstrin and Sec7 domain containing 3                                    | 3,68  | 0,0017 |
| 111 | 72701  | Zfp618        | zinc fingerprotein 618                                                     | -3,67 | 0,0024 |
| 112 | 258503 | Olfir98       | olfactory receptor 98                                                      | 3,66  | 0,0029 |
| 113 | 15572  | Elavl4        | ELAV (embryonic lethal, abnormal vision, Drosophila)-like 4 (Hu antigen D) | -3,60 | 0,0228 |
| 114 | 17965  | Nbl1          | neuroblastoma, suppression of tumorigenicity 1                             | -3,59 | 0,0207 |
| 115 | 244556 | Zfp791        | zinc finger protein 791                                                    | -3,58 | 0,0010 |
| 116 | 19715  | Rex2          | reduced expression 2                                                       | -3,57 | 0,0018 |

|     |        |           |                                                                |       |        |
|-----|--------|-----------|----------------------------------------------------------------|-------|--------|
| 117 | 67733  | Itgb3bp   | integrin beta 3 binding protein (beta3-endonexin)              | -3,57 | 0,0101 |
| 118 | 70713  | Gpr137c   | G protein-coupled receptor 137C                                | -3,52 | 0,1119 |
| 119 | 383940 | LOC383940 | similar to reduced expression 2                                | -3,50 | 0,0130 |
| 120 | 74374  | Clec16a   | C-type lectin domain family 16, member A                       | -3,49 | 0,0089 |
| 121 | 102093 | Phkb      | phosphorylase kinase beta                                      | 3,48  | 0,0002 |
| 122 | 107477 | Guca1b    | guanylate cyclase activator 1B                                 | 3,48  | 0,0080 |
| 123 | 72054  | Cyp4f18   | cytochrome P450, family 4, subfamily f, polypeptide 18         | 3,43  | 0,0046 |
| 124 | 231287 | Atp10d    | ATPase, class V, type 10D                                      | -3,39 | 0,0034 |
| 125 | 259277 | Klk8      | kallikrein related-peptidase 8                                 | -3,37 | 0,0162 |
| 126 | 230972 | Arhgef16  | Rho guanine nucleotide exchange factor (GEF) 16                | -3,37 | 0,0745 |
| 127 | 211228 | Lrrc25    | leucine rich repeat containing 25                              | 3,35  | 0,0163 |
| 128 | 13730  | Emp1      | epithelial membrane protein 1                                  | -3,35 | 0,0024 |
| 129 | 381853 | Gipr      | gastric inhibitory polypeptide receptor                        | -3,34 | 0,0054 |
| 130 | 622205 | EG622205  | predicted gene, EG622205                                       | 3,34  | 0,0008 |
| 131 | 76499  | Clasp2    | CLIP associating protein 2                                     | -3,33 | 0,0019 |
| 132 | 667103 | Gm13570   | predicted gene 13570                                           | 3,31  | 0,0030 |
| 133 | 21784  | Tff1      | trefoil factor 1                                               | 3,29  | 0,0001 |
| 134 | 19652  | Rbm3      | RNA binding motif protein 3                                    | -3,28 | 0,0079 |
| 135 | 55948  | Sfn       | stratifin                                                      | 3,21  | 0,0060 |
| 136 | 12286  | Cacna1a   | calcium channel, voltage-dependent, P/Q type, alpha 1A subunit | -3,21 | 0,0006 |

|     |           |               |                                                                     |       |        |
|-----|-----------|---------------|---------------------------------------------------------------------|-------|--------|
| 137 | 228576    | Mall          | mal, T-cell differentiation protein-like                            | -3,20 | 0,0121 |
| 138 | 71306     | Mfap3l        | microfibrillar-associated protein 3-like                            | 3,20  | 0,0040 |
| 139 | 244579    | Tox3          | TOX high mobility group box family member 3                         | -3,18 | 0,0139 |
| 140 | 224796    | Clic5         | chloride intracellular channel 5                                    | 3,15  | 0,0037 |
| 141 | 67742     | Samsn1        | SAM domain, SH3 domain and nuclear localization signals, 1          | 3,13  | 0,0001 |
| 142 | 67451     | Pkp2          | plakophilin 2                                                       | -3,13 | 0,0137 |
| 143 | 100038586 | Gm10330       | predicted gene 10330                                                | 3,10  | 0,0002 |
| 144 | 69590     | Gpx8          | glutathione peroxidase 8 (putative)                                 | -3,09 | 0,0021 |
| 145 | 70005     | 1700029I01Rik | RIKEN cDNA 1700029I01 gene                                          | 3,06  | 0,0001 |
| 146 | 20856     | Stc2          | stanniocalcin 2                                                     | -3,05 | 0,0016 |
| 147 | 16163     | Il13          | interleukin 13                                                      | -3,04 | 0,0039 |
| 148 | 72297     | B3gnt3        | UDP-GlcNAc:betaGal beta-1,3-N-acetylglucosaminyltransferase 3       | 3,04  | 0,0009 |
| 149 | 13640     | Efna5         | ephrin A5                                                           | -3,02 | 0,0069 |
| 150 | 19041     | Ppl           | periplakin                                                          | -2,99 | 0,0046 |
| 151 | 319701    | Fbxo48        | F-box protein 48                                                    | -2,99 | 0,0040 |
| 152 | 625355    | EG625355      | predicted gene, EG625355                                            | 2,98  | 0,0094 |
| 153 | 102060    | Gadd45gip1    | growth arrest and DNA-damage-inducible, gamma interacting protein 1 | -2,92 | 0,0002 |
| 154 | 67405     | Nts           | neurotensin                                                         | -2,89 | 0,0033 |
| 155 | 13009     | Csrp3         | cysteine and glycine-rich protein 3                                 | -2,89 | 0,0001 |
| 156 | 72309     | Tmem158       | transmembrane protein 158                                           | -2,85 | 0,0095 |

|     |        |         |                                                 |       |        |
|-----|--------|---------|-------------------------------------------------|-------|--------|
| 157 | 21916  | Tmod1   | tropomodulin 1                                  | -2,85 | 0,0012 |
| 158 | 106529 | Tecr    | trans-2,3-enoyl-CoA reductase                   | -2,84 | 0,0023 |
| 159 | 230767 | Iqcc    | IQ motif containing C                           | -2,84 | 0,0037 |
| 160 | 19651  | Rbl2    | retinoblastoma-like 2                           | -2,76 | 0,0005 |
| 161 | 72281  | Sh2d4a  | SH2 domain containing 4A                        | 2,74  | 0,0007 |
| 162 | 11555  | Adrb2   | adrenergic receptor, beta 2                     | -2,69 | 0,0005 |
| 163 | 234366 | Gatad2a | GATA zinc finger domain containing 2A           | 2,69  | 0,0004 |
| 164 | 21968  | Tom1    | target of myb1 homolog (chicken)                | -2,68 | 0,0031 |
| 165 | 18784  | Pla2g5  | phospholipase A2, group V                       | -2,60 | 0,0003 |
| 166 | 666266 | Gm8013  | predicted gene 8013                             | 2,59  | 0,0003 |
| 167 | 17268  | Meis1   | Meis homeobox 1                                 | 2,57  | 0,0003 |
| 168 | 59092  | Pcbp4   | poly(rC) binding protein 4                      | 2,56  | 0,0045 |
| 169 | 72709  | C1qtnf6 | C1q and tumor necrosis factor related protein 6 | -2,49 | 0,0000 |
| 170 | 65973  | Asph    | aspartate-beta-hydroxylase                      | -2,47 | 0,0004 |
| 171 | 17863  | Myb     | myeloblastosis oncogene                         | -2,24 | 0,0000 |

WT/dKO ratio represents the relative intensity detected from WT hybridized samples compared to dKO samples (mean of three replicates). Negative values represent dKO/WT ratio.

## SUPPLEMENTAL REFERENCES

1. Lynn, D. J., Winsor, G. L., Chan, C., Richard, N., Laird, M. R., Barsky, A., Gardy, J. L., Roche, F. M., Chan, T. H., Shah, N., Lo, R., Naseer, M., Que, J., Yau, M., Acab, M., Tulpan, D., Whiteside, M. D., Chikatamarla, A., Mah, B., Munzner, T., Hokamp, K., Hancock, R. E., and Brinkman, F. S. (2008) InnateDB: facilitating systems-level analyses of the mammalian innate immune response. *Mol. Syst. Biol.* 4, 218
2. Graefe, S. E., Streichert, T., Budde, B. S., Nurnberg, P., Steeg, C., Muller-Myhsok, B., and Fleischer, B. (2006) Genes from Chagas susceptibility loci that are differentially expressed in *T. cruzi*-resistant mice are candidates accounting for impaired immunity. *PLoS. ONE.* 1, e57
3. Geiben-Lynn, R., Kursar, M., Brown, N. V., Addo, M. M., Shau, H., Lieberman, J., Luster, A. D., and Walker, B. D. (2003) HIV-1 antiviral activity of recombinant natural killer cell enhancing factors, NKEF-A and NKEF-B, members of the peroxiredoxin family. *J. Biol. Chem.* 278, 1569-1574
4. Shau, H., Kim, A. T., Hedrick, C. C., Lusic, A. J., Tompkins, C., Finney, R., Leung, D. W., and Paglia, D. E. (1997) Endogenous natural killer enhancing factor-B increases cellular resistance to oxidative stresses. *Free Radic. Biol. Med.* 22, 497-507
5. Kuipers, H. F., Biesta, P. J., Montagne, L. J., van Haastert, E. S., van, d., V, and van den Elsen, P. J. (2008) CC chemokine receptor 5 gene promoter activation by the cyclic AMP response element binding transcription factor. *Blood* 112, 1610-1619
6. Kedzierska, K., Crowe, S. M., Turville, S., and Cunningham, A. L. (2003) The influence of cytokines, chemokines and their receptors on HIV-1 replication in monocytes and macrophages. *Rev. Med. Virol.* 13, 39-56
7. Peng, G., Greenwell-Wild, T., Nares, S., Jin, W., Lei, K. J., Rangel, Z. G., Munson, P. J., and Wahl, S. M. (2007) Myeloid differentiation and susceptibility to HIV-1 are linked to APOBEC3 expression. *Blood* 110, 393-400
8. Pido-Lopez, J., Whittall, T., Wang, Y., Bergmeier, L. A., Babaahmady, K., Singh, M., and Lehner, T. (2007) Stimulation of cell surface CCR5 and CD40 molecules by their ligands or by HSP70 up-regulates APOBEC3G expression in CD4(+) T cells and dendritic cells. *J. Immunol.* 178, 1671-1679
9. Parikh, S. S., Litherland, S. A., Clare-Salzler, M. J., Li, W., Gulig, P. A., and Southwick, F. S. (2003) CapG(-/-) mice have specific host defense defects that render them more susceptible than CapG(+/+) mice to *Listeria monocytogenes* infection but not to *Salmonella enterica* serovar Typhimurium infection. *Infect. Immun.* 71, 6582-6590
10. Colombo, S., Buclin, T., Decosterd, L. A., Telenti, A., Furrer, H., Lee, B. L., Biollaz, J., and Eap, C. B. (2006) Orosomucoid (alpha1-acid glycoprotein) plasma concentration and



genetic variants: effects on human immunodeficiency virus protease inhibitor clearance and cellular accumulation. *Clin. Pharmacol. Ther.* 80, 307-318

11. Petkovic, V., Moghini, C., Paoletti, S., Uguccioni, M., and Gerber, B. (2004) I-TAC/CXCL11 is a natural antagonist for CCR5. *J. Leukoc. Biol.* 76, 701-708
12. Yang, Z., Gagarin, D., St, L. G., III, Hammell, N., Toma, I., Hu, C. A., Iwasa, A., and McCaffrey, T. A. (2009) Cardiovascular Inflammation and Lesion Cell Apoptosis. A Novel Connection via the Interferon-Inducible Immunoproteasome. *Arterioscler. Thromb. Vasc. Biol.*
13. van, M. N., de Jong, J. M., Schuurhuis, D. H., van der Voort, E. I., Camps, M. G., Huizinga, T. W., van, K. C., Daha, M. R., Verbeek, J. S., Ossendorp, F., and Toes, R. E. (2007) A novel role of complement factor C1q in augmenting the presentation of antigen captured in immune complexes to CD8<sup>+</sup> T lymphocytes. *J. Immunol.* 178, 7581-7586
14. Lu, J. H., Teh, B. K., Wang, L., Wang, Y. N., Tan, Y. S., Lai, M. C., and Reid, K. B. (2008) The classical and regulatory functions of C1q in immunity and autoimmunity. *Cell Mol. Immunol.* 5, 9-21
15. Baruah, P., Dumitriu, I. E., Malik, T. H., Cook, H. T., Dyson, J., Scott, D., Simpson, E., and Botto, M. (2009) C1q enhances IFN-gamma production by antigen-specific T cells via the CD40 costimulatory pathway on dendritic cells. *Blood* 113, 3485-3493
16. Chen, Y., Park, Y. B., Patel, E., and Silverman, G. J. (2009) IgM antibodies to apoptosis-associated determinants recruit C1q and enhance dendritic cell phagocytosis of apoptotic cells. *J. Immunol.* 182, 6031-6043
17. Pham, C. T., and Ley, T. J. (1999) Dipeptidyl peptidase I is required for the processing and activation of granzymes A and B in vivo. *Proc. Natl. Acad. Sci. U. S. A* 96, 8627-8632
18. Nakagawa, T. Y., and Rudensky, A. Y. (1999) The role of lysosomal proteinases in MHC class II-mediated antigen processing and presentation. *Immunol. Rev.* 172, 121-129
19. De, G. A., Camosseto, V., Thibodeau, J., Ceppi, M., Catalan, N., Pierre, P., and Gatti, E. (2008) MHC class II stabilization at the surface of human dendritic cells is the result of maturation-dependent MARCH I down-regulation. *Proc. Natl. Acad. Sci. U. S. A* 105, 3491-3496
20. Amadou, C., Younger, R. M., Sims, S., Matthews, L. H., Rogers, J., Kumanovics, A., Ziegler, A., Beck, S., and Lindahl, K. F. (2003) Co-duplication of olfactory receptor and MHC class I genes in the mouse major histocompatibility complex. *Hum. Mol. Genet.* 12, 3025-3040
21. Holt, J. P., Bottomly, K., and Mooseker, M. S. (2007) Assessment of myosin II, Va, VI and VIIa loss of function on endocytosis and endocytic vesicle motility in bone marrow-derived dendritic cells. *Cell Motil. Cytoskeleton* 64, 756-766

22. Larsson, M., Majeed, M., Ernst, J. D., Magnusson, K. E., Stendahl, O., and Forsum, U. (1997) Role of annexins in endocytosis of antigens in immature human dendritic cells. *Immunology* 92, 501-511
23. Lepelletier, Y., Moura, I. C., Hadj-Slimane, R., Renand, A., Fiorentino, S., Baude, C., Shirvan, A., Barzilai, A., and Hermine, O. (2006) Immunosuppressive role of semaphorin-3A on T cell proliferation is mediated by inhibition of actin cytoskeleton reorganization. *Eur. J. Immunol.* 36, 1782-1793
24. Lepelletier, Y., Smaniotto, S., Hadj-Slimane, R., Villa-Verde, D. M., Nogueira, A. C., Dardenne, M., Hermine, O., and Savino, W. (2007) Control of human thymocyte migration by Neuropilin-1/Semaphorin-3A-mediated interactions. *Proc. Natl. Acad. Sci. U. S. A* 104, 5545-5550
25. Moretti, S., Procopio, A., Lazzarini, R., Rippon, M. R., Testa, R., Marra, M., Tamagnone, L., and Catalano, A. (2008) Semaphorin3A signaling controls Fas (CD95)-mediated apoptosis by promoting Fas translocation into lipid rafts. *Blood* 111, 2290-2299
26. Balestrieri, B., Maekawa, A., Xing, W., Gelb, M. H., Katz, H. R., and Arm, J. P. (2009) Group V secretory phospholipase A2 modulates phagosome maturation and regulates the innate immune response against *Candida albicans*. *J. Immunol.* 182, 4891-4898
27. Katoh, Y., Imakagura, H., Futatsumori, M., and Nakayama, K. (2006) Recruitment of clathrin onto endosomes by the Tom1-Tollip complex. *Biochem. Biophys. Res. Commun.* 341, 143-149
28. Yamakami, M., Yoshimori, T., and Yokosawa, H. (2003) Tom1, a VHS domain-containing protein, interacts with tollip, ubiquitin, and clathrin. *J. Biol. Chem.* 278, 52865-52872
29. Poggi, A., Carosio, R., Rubartelli, A., and Zocchi, M. R. (2002) Beta(3)-mediated engulfment of apoptotic tumor cells by dendritic cells is dependent on CAMKII: inhibition by HIV-1 Tat. *J. Leukoc. Biol.* 71, 531-537
30. Morelli, A. E., Larregina, A. T., Shufesky, W. J., Sullivan, M. L., Stolz, D. B., Papworth, G. D., Zahorchak, A. F., Logar, A. J., Wang, Z., Watkins, S. C., Falo, L. D., Jr., and Thomson, A. W. (2004) Endocytosis, intracellular sorting, and processing of exosomes by dendritic cells. *Blood* 104, 3257-3266
31. de, B. A., and Lanzavecchia, A. (2000) The role of aquaporins in dendritic cell macropinocytosis. *J. Exp. Med.* 191, 743-748
32. Smith, E. E., and Malik, H. S. (2009) The apolipoprotein L family of programmed cell death and immunity genes rapidly evolved in primates at discrete sites of host-pathogen interactions. *Genome Res.* 19, 850-858
33. Zhu, P., Zhou, W., Wang, J., Puc, J., Ohgi, K. A., Erdjument-Bromage, H., Tempst, P., Glass, C. K., and Rosenfeld, M. G. (2007) A histone H2A deubiquitinase complex coordinating

histone acetylation and H1 dissociation in transcriptional regulation. *Mol. Cell* 27, 609-621

34. O'Rourke, F. A., LaPlante, J. M., and Feinstein, M. B. (2003) Antisense-mediated loss of calcium homeostasis endoplasmic reticulum protein (CHERP; ERPROT213-21) impairs Ca<sup>2+</sup> mobilization, nuclear factor of activated T-cells (NFAT) activation and cell proliferation in Jurkat T-lymphocytes. *Biochem. J.* 373, 133-143
35. Wolf, A. M., Wolf, D., Rumpold, H., Enrich, B., and Tilg, H. (2004) Adiponectin induces the anti-inflammatory cytokines IL-10 and IL-1RA in human leukocytes. *Biochem. Biophys. Res. Commun.* 323, 630-635
36. Garitaonandia, I., Smith, J. L., Kupchak, B. R., and Lyons, T. J. (2009) Adiponectin identified as an agonist for PAQR3/RKTG using a yeast-based assay system. *J. Recept. Signal. Transduct. Res.* 29, 67-73
37. Li, S., Zhang, C., Takemori, H., Zhou, Y., and Xiong, Z. Q. (2009) TORC1 regulates activity-dependent CREB-target gene transcription and dendritic growth of developing cortical neurons. *J. Neurosci.* 29, 2334-2343
38. Takami, Y., Nakagami, H., Morishita, R., Katsuya, T., Cui, T. X., Ichikawa, T., Saito, Y., Hayashi, H., Kikuchi, Y., Nishikawa, T., Baba, Y., Yasuda, O., Rakugi, H., Ogihara, T., and Kaneda, Y. (2007) Ubiquitin carboxyl-terminal hydrolase L1, a novel deubiquitinating enzyme in the vasculature, attenuates NF-kappaB activation. *Arterioscler. Thromb. Vasc. Biol.* 27, 2184-2190
39. Schall, T. J., Bacon, K., Toy, K. J., and Goeddel, D. V. (1990) Selective attraction of monocytes and T lymphocytes of the memory phenotype by cytokine RANTES. *Nature* 347, 669-671
40. Takahashi, M., Fujita, M., Furukawa, Y., Hamamoto, R., Shimokawa, T., Miwa, N., Ogawa, M., and Nakamura, Y. (2002) Isolation of a novel human gene, APCDD1, as a direct target of the beta-Catenin/T-cell factor 4 complex with probable involvement in colorectal carcinogenesis. *Cancer Res.* 62, 5651-5656
41. Rissoan, M. C., Duhon, T., Bridon, J. M., Bendriss-Vermare, N., Peronne, C., de, S., V, Briere, F., and Bates, E. E. (2002) Subtractive hybridization reveals the expression of immunoglobulin-like transcript 7, Eph-B1, granzyme B, and 3 novel transcripts in human plasmacytoid dendritic cells. *Blood* 100, 3295-3303
42. Hess, J. L., Bittner, C. B., Zeisig, D. T., Bach, C., Fuchs, U., Borkhardt, A., Frampton, J., and Slany, R. K. (2006) c-Myb is an essential downstream target for homeobox-mediated transformation of hematopoietic cells. *Blood* 108, 297-304
43. Goh, S. L., Looi, Y., Shen, H., Fang, J., Bodner, C., Houle, M., Ng, A. C., Screatton, R. A., and Featherstone, M. (2009) Transcriptional activation by MEIS1A in response to PKA signalling requires the TORC family of CREB co-activators. *J. Biol. Chem.*

44. Pani, E., and Ferrari, S. (2008) p38MAPK delta controls c-Myb degradation in response to stress. *Blood Cells Mol. Dis.* 40, 388-394
45. Sano, Y., and Ishii, S. (2001) Increased affinity of c-Myb for CREB-binding protein (CBP) after CBP-induced acetylation. *J. Biol. Chem.* 276, 3674-3682
46. Mizuno, K., Takahashi, H. K., Iwagaki, H., Katsuno, G., Kamurul, H. A., Ohtani, S., Mori, S., Yoshino, T., Nishibori, M., and Tanaka, N. (2005) Beta2-adrenergic receptor stimulation inhibits LPS-induced IL-18 and IL-12 production in monocytes. *Immunol. Lett.* 101, 168-172
47. Radstake, T. R., Nabbe, K. C., Wenink, M. H., Roelofs, M. F., Oosterlaar, A., van Lieshout, A. W., Barrera, P., van Lent, P. L., and van den Berg, W. B. (2005) Dendritic cells from patients with rheumatoid arthritis lack the interleukin 13 mediated increase of Fc gamma RII expression, which has clear functional consequences. *Ann. Rheum. Dis.* 64, 1737-1743
48. Hernandez-Negrete, I., Carretero-Ortega, J., Rosenfeldt, H., Hernandez-Garcia, R., Calderon-Salinas, J. V., Reyes-Cruz, G., Gutkind, J. S., and Vazquez-Prado, J. (2007) P-Rex1 links mammalian target of rapamycin signaling to Rac activation and cell migration. *J. Biol. Chem.* 282, 23708-23715
49. Lindh, E., Lind, S. M., Lindmark, E., Hassler, S., Perheentupa, J., Peltonen, L., Winqvist, O., and Karlsson, M. C. (2008) AIRE regulates T-cell-independent B-cell responses through BAFF. *Proc. Natl. Acad. Sci. U. S. A* 105, 18466-18471
50. Belladonna, M. L., Volpi, C., Bianchi, R., Vacca, C., Orabona, C., Pallotta, M. T., Boon, L., Gizzi, S., Fioretti, M. C., Grohmann, U., and Puccetti, P. (2008) Cutting edge: Autocrine TGF-beta sustains default tolerogenesis by IDO-competent dendritic cells. *J. Immunol.* 181, 5194-5198
51. Staal, F. J., Luis, T. C., and Tiemessen, M. M. (2008) WNT signalling in the immune system: WNT is spreading its wings. *Nat. Rev. Immunol.* 8, 581-593
52. Illario, M., Giardino-Torchia, M. L., Sankar, U., Ribar, T. J., Galgani, M., Vitiello, L., Masci, A. M., Bertani, F. R., Ciaglia, E., Astone, D., Maulucci, G., Cavallo, A., Vitale, M., Cimini, V., Pastore, L., Means, A. R., Rossi, G., and Racioppi, L. (2008) Calmodulin-dependent kinase IV links Toll-like receptor 4 signaling with survival pathway of activated dendritic cells. *Blood* 111, 723-731
53. Castro-Rivera, E., Ran, S., Brekken, R. A., and Minna, J. D. (2008) Semaphorin 3B inhibits the phosphatidylinositol 3-kinase/Akt pathway through neuropilin-1 in lung and breast cancer cells. *Cancer Res.* 68, 8295-8303
54. Xia, S., Guo, Z., Yao, Y., Xu, X., Yi, H., Xia, D., and Cao, X. (2008) Liver stroma enhances activation of TLR3-triggered NK cells through fibronectin. *Mol. Immunol.* 45, 2831-2838

55. Richens, J., Fairclough, L., Ghaemmaghani, A. M., Mahdavi, J., Shakib, F., and Sewell, H. F. (2007) The detection of ADAM8 protein on cells of the human immune system and the demonstration of its expression on peripheral blood B cells, dendritic cells and monocyte subsets. *Immunobiology* 212, 29-38
56. Fritsche, J., Moser, M., Faust, S., Peuker, A., Buttner, R., Andreesen, R., and Kreutz, M. (2000) Molecular cloning and characterization of a human metalloprotease disintegrin--a novel marker for dendritic cell differentiation. *Blood* 96, 732-739
57. Tsai, I. F., Lin, C. Y., Huang, C. T., Lin, Y. C., Yang, C. M., Lin, Y. C., and Liao, C. H. (2007) Modulation of human monocyte-derived dendritic cells maturation by a soluble guanylate cyclase activator, YC-1, in a cyclic nucleotide independent manner. *Int. Immunopharmacol.* 7, 1299-1310
58. Mattioli, B., Straface, E., Matarrese, P., Quaranta, M. G., Giordani, L., Malorni, W., and Viora, M. (2008) Leptin as an immunological adjuvant: enhanced migratory and CD8+ T cell stimulatory capacity of human dendritic cells exposed to leptin. *FASEB J.* 22, 2012-2022
59. Mattioli, B., Giordani, L., Quaranta, M. G., and Viora, M. (2009) Leptin exerts an anti-apoptotic effect on human dendritic cells via the PI3K-Akt signaling pathway. *FEBS Lett.* 583, 1102-1106
60. Shen, L. H., Zhou, L., Wang, B. Y., Pu, J., Hu, L. H., Chai, D. J., Wang, L., Zeng, J. Z., and He, B. (2008) Oxidized low-density lipoprotein induces differentiation of RAW264.7 murine macrophage cell line into dendritic-like cells. *Atherosclerosis* 199, 257-264
61. Perrin-Cocon, L., Coutant, F., Agaoglu, S., Deforges, S., Andre, P., and Lotteau, V. (2001) Oxidized low-density lipoprotein promotes mature dendritic cell transition from differentiating monocyte. *J. Immunol.* 167, 3785-3791
62. Dietz, A. B., Bulur, P. A., Knutson, G. J., Matasic, R., and Vuk-Pavlovic, S. (2000) Maturation of human monocyte-derived dendritic cells studied by microarray hybridization. *Biochem. Biophys. Res. Commun.* 275, 731-738
63. Christmas, P., Tolentino, K., Primo, V., Berry, K. Z., Murphy, R. C., Chen, M., Lee, D. M., and Soberman, R. J. (2006) Cytochrome P-450 4F18 is the leukotriene B4 omega-1/omega-2 hydroxylase in mouse polymorphonuclear leukocytes: identification as the functional orthologue of human polymorphonuclear leukocyte CYP4F3A in the down-regulation of responses to LTB4. *J. Biol. Chem.* 281, 7189-7196
64. Del, P. A., Shao, W. H., Mitola, S., Santoro, G., Sozzani, S., and Haribabu, B. (2007) Regulation of dendritic cell migration and adaptive immune response by leukotriene B4 receptors: a role for LTB4 in up-regulation of CCR7 expression and function. *Blood* 109, 626-631
65. Chakraborty, A., Brooks, H., Zhang, P., Smith, W., McReynolds, M. R., Hoying, J. B., Bick, R., Truong, L., Poindexter, B., Lan, H., Elbjeirami, W., and Sheikh-Hamad, D. (2007) Stanniocalcin-1 regulates endothelial gene expression and modulates transendothelial migration of leukocytes. *Am. J. Physiol Renal Physiol* 292, F895-F904

66. Gao, J. L., Guillabert, A., Hu, J., Le, Y., Urizar, E., Seligman, E., Fang, K. J., Yuan, X., Imbault, V., Communi, D., Wang, J. M., Parmentier, M., Murphy, P. M., and Migeotte, I. (2007) F2L, a peptide derived from heme-binding protein, chemoattracts mouse neutrophils by specifically activating Fpr2, the low-affinity N-formylpeptide receptor. *J. Immunol.* 178, 1450-1456
67. Pendl, G. G., Robert, C., Steinert, M., Thanos, R., Eytner, R., Borges, E., Wild, M. K., Lowe, J. B., Fuhlbrigge, R. C., Kupper, T. S., Vestweber, D., and Grabbe, S. (2002) Immature mouse dendritic cells enter inflamed tissue, a process that requires E- and P-selectin, but not P-selectin glycoprotein ligand 1. *Blood* 99, 946-956
